# Supplementary material for: Schistosoma haematobium infection morbidity, praziquantel effectiveness and reinfection rate among children and young adults in Gabon
Source: Parasit Vectors. 2019 Dec 10;12:577. doi: 10.1186/s13071-019-3836-6 (PMC6905022; doi:10.1186/s13071-019-3836-6)
Supplement: Supplementary file 1 — Additional file 1: Table S1. Name and modalities of each variable included in the analysis. Table S2. Database used for the longitudinal analysis. Table S3. Database used for drug efficacy assessment. Table S4. Database used for the survival analysis. [file 13071_2019_3836_MOESM1_ESM.xlsx]

## Sheet: Table S1
Additional file 1: Table S1. Name and modalities of each variable included in the analysis
	Variable name	Modalities	Comment
Longitudinal Analysis database
	ID	.	study identification number
	Age	.	age of participants, in year
	Sex	F	participant sex, if female
	.	M	participant sex, if male
	Adresse	.	participant adresse
	Location	.	participant location
	DateScreening	.	screening visit date
	DateFirstVisit	.	date of the first study visit
	EndOfFU_Phase1	.	last visit date for the first follow-up phase
	SchistoStatusAtV6	negative	if found negative for Schistosoma infection at month 6 follow-up visit
	.	positive	if found positive for Schistosoma infection at month 6 follow-up visit
	SchistoStatusPhase1	negative	the participant is classified as schistosoma negative for the first follow-up phase
	.	positive	the participant is classified as schistosoma positive for the first follow-up phase
	VisitOfPositivity_Phase1	uv	the diagnosis of schistosomiasis is made during an unscheduled visit during the phase 1 follow-up
	.	v6	the diagnosis of schistosomiasis made during at month6 visit during the phase 1 follow-up
	DateOfPositivity	.	date of the visit when the participant was found positive
	eggs_count_phase1	.	eggs count result for assessment of Schistosoma status at phase1 follow-up
	infection_intensity_phase1	light	schistosoma infection diagnosed during the phase 1 follow-up classified as light infection
	.	heavy	schistosoma infection diagnosed during the phase 1 follow-up classified as heavy infection
	DatePZQ_Dose1	.	date of first praziquantel dose adminisration
	DatePZQ_Dose2	.	date of second praziquantel dose adminisration
	DatePZQ_Dose3	.	date of thrid praziquantel dose adminisration
	PresentPhase2	no	if the participant is absent for the second study follow-up phase
	.	yes	if the participant is present for the second study follow-up phase
	DateFirstVisitPhase2	.	date of the first visit of the second study phase
	DateP6Visit_Phase2	.	date of the last visit of the second study phase
	FU_Outcome	withdrawn	If the participant withdrawn from the study and therefore did not completed the follow-up phase up to month 15
		completed	if the participant completed the follow-up phase up to month 15
	schistoStatus_PhaseFU2	negative	if the participant is found negative for Schistosoma infection during the second phase follow-up
	.	positive	if the participant is found positive for Schistosoma infection during the second phase follow-up
	eggs_count_phase2	.	eggs count result during the assessment of Schistosoma status at phase2 follow-up
	infection_intensity_phase2	light	schistosoma infection diagnosed during the phase 2 follow-up classified as light infection
	.	heavy	schistosoma infection diagnosed during the phase 2 follow-up classified as heavy infection
	study_enddate_fu	.	date of the last visit of the overall study course
	overall_schisto_statut	schisto_neg	classified as Schistosoma negative for the overall study course
	.	schisto_pos	classified as Schistosoma positive for the overall study course
	uv_visit	yes	unscheduled visit performed for visible haematuria complaint during the follow-up
	.	no	no unscheduled visit performed during the follow-up
	uv_date	.	date when the unscheduled visit was performed
	eggs_count_uv_visit	.	urine filtration result performed during the unscheduled visit for visible haematuria
	uv_intensity	light	Schistosoma infection diagnosed during the unscheduled visit performed for visible haematuria classified as light
	.	heavy	Schistosoma infection diagnosed during the unscheduled visit performed for visible haematuria classified as heavy
	uv_phase	phase1	the unscheduled visit was performed during the first study phase
	.	phase2	the unscheduled visit was performed during the second study phase
DrugEfficacyAssessment database
	ID	.	study identification number
	age	.	participant age, in year
	sex	F	participant sex, if female
	.	M	participant sex, if male
	weight	.	participant weight, in kilogram
	location	.	participant location
	date_event	.	date of the diagnosis of schistosomiasis
	first_event_occured_at	uv	type of visit when the participant was found schistosoma positive, if at uv visit
	.	v6	type of visit when the participant was found schistosoma positive, if at v6 visit
	.	p6	type of visit when the participant was found schistosoma positive, if at p6 visit
	eggs_count	.	number of schistosoma eggs found during urine filtration exam
	MacroHaematuria	no	if visible haematuria was not reported by the study participant
	.	yes	if visible haematuria was reported by the study participant during the uv visit
	intensity	light	Schistosoma infection classified as light intensity
	.	heavy	Schistosoma infection classified as heavy intensity
	dose_PZQ_tablet	.	number of PZQ tablet received by the participant for schistososomiasis treatment
	treatment1_date	.	date when the first praziquantel dose was administered to the participant
	Control1_date	.	date of the control after the first PZQ administration
	Control1_eggs_count	.	number of schistosoma eggs found after urine filtration exam during the first control
	status_control1	neg	if urine filtration negative during the first control
		pos	if urine filtration positive during the first control
	treatment2_date	.	date when the second praziquantel dose was administered to the participant
	Control2_date	.	date of the control after the second PZQ administration
	Control2_eggs_count	.	number of schistosoma eggs found after urine filtration exam during the second control
	status_control2	neg	if urine filtration negative during the second control
	.	pos	if urine filtration positive during the second control
	treatment3_date	.	date when the third praziquantel dose was administered to the participant
	Control3_date	.	date of the control after the third PZQ administration
	Control3_eggs_count	.	number of schistosoma eggs found after urine filtration exam during the third control
	status_control3	neg	if urine filtration negative during the third control
	.	pos	if urine filtration positive during the third control
	IncludForPZQEfficacy	no	If the participant was not included for praziquantel efficacy analysis
	.	yes	If the participant was included for praziquantel efficacy analysis
	date_P6	.	date when the month 15 visit was performed, p6 visit
	statut_P6	negative_p6	if the urine filtration was negative at P6 (month15) visit
	.	positive_p6	if the urine filtration was positive at P6 (month15) visit
	eggs_count_result_p6	.	number of schistosoma eggs found after urine filtration exam during the P6 (month15) visit
SurvivalAnalysis database
	ID	.	Study identification number
	age	.	Participant age, in year
	sex	F	Participant sex, if female
	.	M	Participant sex, if male
	location	pk	Participant location, if pk
		bindo	Participant location, if bindo
	date_event	.	date when the event where recorded
	first_event_occured_at	uv	type of visit when the first event occurred, unscheduled visit (uv visit)
		v6	type of visit when the first event occurred, last visit phase1 visit (v6 visit)
		p6	type of visit when the first event occurred, last visit phase2 visit (p6 visit)
	eggs_count	.	number of schistosoma eggs count per 10 mL of urine during the urine filtration exam
	MacroHaematuria	no	no visible haematuria complaint
	.	yes	if the participant complained for visible haematuria confirmed by Rapid Deep Stick test
	infection_intensity	light	Schistosoma infection diagnosed during the unscheduled visit performed for visible haematuria classified as light infection
	.	heavy	Schistosoma infection diagnosed during the unscheduled visit performed for visible haematuria classified as heavy infection
	event_code	0	no event occurred. the participant remains positive for urine filtration after treatment with praziquantel
	.	1	the participant become negative for urine filtration after treatment with praziquantel
	t	1	time to when the participant was diagnose negative or time of censoring, if at dose 1
	.	3	time to when the participant was diagnose negative or time of censoring, if at dose 3
	treatment1_date	.	date of the first praziquantel administration
	Control1_date	.	date of the first schistosoma status control
	Control1_eggs_count	.	eggs count at the first control of schistosoma status
	status_control1	neg	negative for schsitosoma eggs at the first schistosoma control status
	.	pos	positive for schsitosoma eggs at the first schistosoma control status
	treatment3_date	.	date of the third praziquantel administration
	Control3_date	.	date of the third schistosoma status control
	Control3_eggs_count	.	eggs count at the third control of schistosoma status
	status_control3	neg	negative for schsitosoma eggs at the third schistosoma control status
	.	pos	positive for schsitosoma eggs at the third schistosoma control status

## Sheet: Table S2
Additional file 1: Table S2. Database used for the longitudinal analysis
ID	Age	Sex	Adresse	location	DateScreening	DateFirstVisit	EndOfFU_Phase1	SchistoStatusAtV6	SchistoStatusPhase1	VisitOfPositivity_Phase1	DateOfPositivity	eggs_count_phase1	infection_intensity_phase1	DatePZQ_Dose1	DatePZQ_Dose2	DatePZQ_Dose3	PresentPhase2	DateFirstVisitPhase2	DateP6Visit_Phase2	FU_Outcome	schistoStatus_PhaseFU2	eggs_count_phase2	infection_intensity_phase2	study_enddate_fu	overall_schisto_statut	uv_visit	uv_date	eggs_count_uv_visit	uv_intensity	uv_phase
TM-L001	10	F	PK09	pk	2016-02-25	2016-06-20	2017-01-27	negative	negative	NA	NA	NA	NA	NA	NA	NA	yes	2017-06-30	2018-02-12	completed	negative	NA	NA	2018-02-12	schisto_neg	no	NA	NA	NA	NA
TM-L002	13	F	PK09	pk	2016-02-25	2016-06-20	2017-01-31	negative	negative	NA	NA	NA	NA	NA	NA	NA	yes	2017-08-31	NA	withdrawn	NA	NA	NA	2017-08-31	schisto_neg	no	NA	NA	NA	NA
TM-L003	16	F	PK09	pk	2016-02-25	2016-06-20	2016-07-15	NA	NA	NA	NA	NA	NA	NA	NA	NA	no	NA	NA	withdrawn	NA	NA	NA	2016-07-15	NA	no	NA	NA	NA	NA
TM-L004	7	F	PK09	pk	2016-02-25	2016-06-20	2017-01-27	negative	negative	NA	NA	NA	NA	NA	NA	NA	yes	2017-08-31	NA	withdrawn	NA	NA	NA	2017-08-31	schisto_neg	no	NA	NA	NA	NA
TM-L005	14	M	PK09	pk	2016-02-25	2016-06-20	2017-01-31	negative	negative	NA	NA	NA	NA	NA	NA	NA	yes	2017-07-04	NA	withdrawn	NA	NA	NA	2017-08-31	schisto_neg	no	NA	NA	NA	NA
TM-L006	11	M	PK18	pk	2016-03-07	2016-06-23	2017-02-10	negative	negative	NA	NA	NA	NA	NA	NA	NA	yes	2017-06-21	2018-01-30	completed	negative	NA	NA	2018-01-30	schisto_neg	no	NA	NA	NA	NA
TM-L007	6	F	PK18	pk	2016-03-03	2016-06-23	2017-02-08	negative	negative	NA	NA	NA	NA	NA	NA	NA	yes	2017-06-21	2018-01-30	completed	positive	2	light	2018-01-30	schisto_pos	no	NA	NA	NA	NA
TM-L008	9	F	PK09	pk	2016-02-25	2016-06-20	2017-01-27	negative	negative	NA	NA	NA	NA	NA	NA	NA	yes	2017-08-31	NA	withdrawn	NA	NA	NA	2017-08-31	schisto_neg	no	NA	NA	NA	NA
TM-L009	16	M	PK18	pk	2016-03-07	2016-12-16	2017-02-20	negative	negative	NA	NA	NA	NA	NA	NA	NA	yes	2018-02-13	2018-02-13	completed	negative	NA	NA	2018-02-13	schisto_neg	no	NA	NA	NA	NA
TM-L010	8	F	PK09	pk	2016-02-25	2016-06-20	2017-01-27	negative	negative	NA	NA	NA	NA	NA	NA	NA	yes	2017-06-30	NA	withdrawn	NA	NA	NA	2017-08-31	schisto_neg	no	NA	NA	NA	NA
TM-L011	10	F	PK10	pk	2016-02-25	2016-06-20	2017-02-14	negative	negative	NA	NA	NA	NA	NA	NA	NA	yes	2017-07-04	2018-02-12	completed	negative	NA	NA	2018-02-12	schisto_neg	no	NA	NA	NA	NA
TM-L012	9	M	PK10	pk	2016-02-25	2016-06-20	2016-11-16	negative	negative	NA	NA	NA	NA	NA	NA	NA	yes	2017-09-26	2018-02-08	completed	negative	NA	NA	2018-02-08	schisto_neg	no	NA	NA	NA	NA
TM-L013	8	F	PK10	pk	2016-02-25	2016-06-20	2017-02-16	negative	negative	NA	NA	NA	NA	NA	NA	NA	yes	2017-07-04	NA	withdrawn	NA	NA	NA	2017-08-02	schisto_neg	no	NA	NA	NA	NA
TM-L014	7	M	PK10	pk	2016-02-25	2016-11-16	2017-02-16	negative	negative	NA	NA	NA	NA	NA	NA	NA	yes	2017-07-04	2018-02-12	completed	negative	NA	NA	2018-02-12	schisto_neg	no	NA	NA	NA	NA
TM-L015	9	M	PK14	pk	2016-02-29	2016-07-08	2017-01-31	positive	positive	V6	NA	3	light	2017-04-20	2017-05-19	2017-06-14	no	NA	NA	withdrawn	NA	NA	NA	2017-01-31	schisto_pos	no	NA	NA	NA	NA
TM-L016	6	M	PK14	pk	2016-02-29	2016-07-08	2017-02-03	positive	positive	V6	NA	5	light	2017-04-13	2017-05-19	2017-06-14	yes	2017-07-28	NA	withdrawn	NA	NA	NA	2017-08-23	schisto_pos	no	NA	NA	NA	NA
TM-L017	10	F	PK18	pk	2016-03-14	2016-06-23	2017-02-09	positive	positive	V6	NA	7	light	2017-04-03	2017-05-18	2017-06-14	yes	2017-08-23	2018-01-30	completed	negative	NA	NA	2018-01-30	schisto_pos	no	NA	NA	NA	NA
TM-L018	10	F	PK18	pk	2016-03-03	2016-06-23	2017-02-10	negative	negative	NA	NA	NA	NA	NA	NA	NA	yes	2017-10-20	2018-01-30	completed	positive	2	light	2018-01-30	schisto_pos	no	NA	NA	NA	NA
TM-L019	22	F	PK27	pk	2016-03-10	2016-06-29	2017-02-17	negative	negative	NA	NA	NA	NA	NA	NA	NA	no	NA	NA	withdrawn	NA	NA	NA	2017-02-17	schisto_neg	no	NA	NA	NA	NA
TM-L020	12	M	PK28	pk	2016-03-08	2016-06-28	2017-02-01	positive	positive	V6	NA	7	light	2017-04-25	2017-05-22	2017-06-27	yes	2017-07-13	2018-02-12	completed	negative	NA	NA	2018-02-12	schisto_pos	no	NA	NA	NA	NA
TM-L021	12	F	PK18	pk	2016-03-03	2016-06-23	2017-02-24	positive	positive	V6	NA	8	light	2017-04-03	2017-05-19	2017-06-29	yes	2017-09-19	2018-02-09	completed	negative	NA	NA	2018-02-09	schisto_pos	no	NA	NA	NA	NA
TM-L022	12	M	PK18	pk	2016-03-03	2016-11-18	2016-08-19	positive	positive	V6	NA	4	light	2017-04-18	2017-05-22	2017-06-29	no	NA	NA	withdrawn	NA	NA	NA	2016-08-19	schisto_pos	no	NA	NA	NA	NA
TM-L023	13	M	PK18	pk	2016-03-07	2017-02-24	2017-02-24	NA	NA	NA	NA	NA	NA	NA	NA	NA	yes	2017-06-23	NA	withdrawn	NA	NA	NA	2017-06-23	NA	no	NA	NA	NA	NA
TM-L024	9	F	PK14	pk	2016-02-29	2017-02-20	2017-02-20	positive	positive	V6	NA	419	heavy	2017-04-24	2017-05-22	2017-06-27	yes	2017-07-25	NA	withdrawn	NA	NA	NA	2017-07-25	schisto_pos	no	NA	NA	NA	NA
TM-L025	11	M	PK14	pk	2016-02-29	2016-11-16	2017-02-20	positive	positive	V6	NA	15	light	2017-04-03	2017-05-19	2017-06-14	yes	2017-08-04	2018-01-26	completed	positive	3	light	2018-01-26	schisto_pos	no	NA	NA	NA	NA
TM-L026	10	F	PK14	pk	2016-02-29	2016-06-28	2016-11-25	negative	negative	NA	NA	NA	NA	NA	NA	NA	yes	2017-07-06	2018-02-06	completed	negative	NA	NA	2018-02-06	schisto_neg	no	NA	NA	NA	NA
TM-L027	12	F	PK15	pk	2016-03-01	2016-06-21	2017-02-08	positive	positive	V6	NA	27	light	2017-04-03	2017-05-17	2017-06-14	yes	2017-07-31	2018-01-23	completed	positive	6	light	2018-01-23	schisto_pos	no	NA	NA	NA	NA
TM-L028	12	F	PK15	pk	2016-03-01	2016-06-29	2017-02-10	negative	negative	NA	NA	NA	NA	NA	NA	NA	yes	2017-07-10	2018-02-06	completed	negative	NA	NA	2018-02-06	schisto_neg	no	NA	NA	NA	NA
TM-L029	13	M	PK27	pk	2016-03-08	2016-06-28	2016-06-28	NA	NA	NA	NA	NA	NA	NA	NA	NA	no	NA	NA	withdrawn	NA	NA	NA	2016-06-28	NA	no	NA	NA	NA	NA
TM-L030	9	M	PK27	pk	2016-03-08	2016-06-28	2016-06-28	NA	NA	NA	NA	NA	NA	NA	NA	NA	no	NA	NA	withdrawn	NA	NA	NA	2016-06-28	NA	no	NA	NA	NA	NA
TM-L031	11	M	PK27	pk	2016-03-14	2016-06-28	2016-06-28	NA	NA	NA	NA	NA	NA	NA	NA	NA	no	NA	NA	withdrawn	NA	NA	NA	2016-06-28	NA	no	NA	NA	NA	NA
TM-L032	10	M	PK15	pk	2016-03-01	2016-06-29	2017-02-10	positive	positive	V6	NA	7	light	2017-03-31	2017-05-17	2017-06-14	yes	2017-07-21	2018-01-23	completed	negative	NA	NA	2018-01-23	schisto_pos	no	NA	NA	NA	NA
TM-L033	9	F	PK27	pk	2016-03-10	2016-06-28	2016-06-28	NA	NA	NA	NA	NA	NA	NA	NA	NA	no	NA	NA	withdrawn	NA	NA	NA	2016-06-28	NA	no	NA	NA	NA	NA
TM-L034	9	F	PK22	pk	2016-03-04	2016-06-21	2016-06-21	NA	NA	NA	NA	NA	NA	NA	NA	NA	no	NA	NA	withdrawn	NA	NA	NA	2016-06-21	NA	no	NA	NA	NA	NA
TM-L035	10	F	PK27	pk	2016-03-10	2016-06-28	2016-06-28	NA	NA	NA	NA	NA	NA	NA	NA	NA	no	NA	NA	withdrawn	NA	NA	NA	2016-06-28	NA	no	NA	NA	NA	NA
TM-L036	11	F	PK27	pk	2016-03-08	2016-06-28	2017-02-01	positive	positive	V6	NA	4	light	NA	NA	NA	no	NA	NA	withdrawn	NA	NA	NA	2017-02-01	schisto_pos	no	NA	NA	NA	NA
TM-L037	13	F	PK20	pk	2016-04-04	2016-06-28	2017-01-25	negative	negative	NA	NA	NA	NA	NA	NA	NA	yes	2017-06-21	2018-01-29	completed	negative	NA	NA	2018-01-29	schisto_neg	no	NA	NA	NA	NA
TM-L038	9	M	PK20	pk	2016-03-04	2016-06-28	2017-01-25	negative	negative	NA	NA	NA	NA	NA	NA	NA	yes	2017-06-21	2018-02-01	completed	negative	NA	NA	2018-02-01	schisto_neg	no	NA	NA	NA	NA
TM-L039	10	M	PK20	pk	2016-03-24	2016-06-20	2017-01-25	positive	positive	V6	NA	6	light	2017-04-04	2017-05-18	2017-06-15	yes	2017-07-31	2018-02-01	completed	negative	NA	NA	2018-02-01	schisto_pos	yes	NA	NA	NA	NA
TM-L040	16	F	PK20	pk	2016-03-04	2016-06-28	2017-01-25	negative	negative	NA	NA	NA	NA	NA	NA	NA	yes	2017-06-21	2018-02-01	completed	negative	NA	NA	2018-02-01	schisto_neg	no	NA	NA	NA	NA
TM-L041	9	F	PK20	pk	2016-03-22	2016-06-20	2016-09-15	NA	NA	NA	NA	NA	NA	NA	NA	NA	no	NA	NA	withdrawn	NA	NA	NA	2016-09-15	NA	no	NA	NA	NA	NA
TM-L042	13	M	PK28	pk	2016-03-16	2017-02-01	2017-02-01	NA	NA	NA	NA	NA	NA	NA	NA	NA	yes	2017-07-13	NA	withdrawn	NA	NA	NA	2017-07-13	NA	no	NA	NA	NA	NA
TM-L043	6	M	PK28	pk	2016-04-07	2016-06-28	2016-09-14	negative	negative	NA	NA	NA	NA	NA	NA	NA	yes	2017-07-13	NA	withdrawn	NA	NA	NA	2017-07-13	schisto_neg	no	NA	NA	NA	NA
TM-L044	17	M	PK29	pk	2016-04-07	2016-09-07	2016-09-07	NA	NA	NA	NA	NA	NA	NA	NA	NA	no	NA	NA	withdrawn	NA	NA	NA	2016-09-07	NA	no	NA	NA	NA	NA
TM-L045	19	M	PK28	pk	2016-03-08	2016-07-14	2016-09-07	NA	NA	NA	NA	NA	NA	NA	NA	NA	no	NA	NA	withdrawn	NA	NA	NA	2016-09-07	NA	no	NA	NA	NA	NA
TM-L046	13	M	PK20	pk	2016-03-11	2016-06-20	2017-01-25	negative	negative	NA	NA	NA	NA	NA	NA	NA	yes	2017-07-31	2018-02-01	completed	negative	NA	NA	2018-02-01	schisto_neg	no	NA	NA	NA	NA
TM-L047	7	F	PK29	pk	2016-04-11	2016-06-29	2017-02-01	negative	negative	NA	NA	NA	NA	NA	NA	NA	yes	2017-07-12	NA	withdrawn	NA	NA	NA	2017-08-30	schisto_neg	no	NA	NA	NA	NA
TM-L048	13	M	PK29	pk	2016-04-06	2016-06-30	2016-11-24	negative	negative	NA	NA	NA	NA	NA	NA	NA	no	NA	NA	withdrawn	NA	NA	NA	2016-11-24	schisto_neg	no	NA	NA	NA	NA
TM-L049	11	M	PK20	pk	2016-03-16	2016-06-21	2016-06-21	NA	NA	NA	NA	NA	NA	NA	NA	NA	no	NA	NA	withdrawn	NA	NA	NA	2016-06-21	NA	no	NA	NA	NA	NA
TM-L050	9	M	PK20	pk	2016-03-24	2016-06-20	2016-06-20	NA	NA	NA	NA	NA	NA	NA	NA	NA	no	NA	NA	withdrawn	NA	NA	NA	2016-06-20	NA	no	NA	NA	NA	NA
TM-L051	8	M	PK20	pk	2016-03-04	2016-06-20	2017-01-25	negative	negative	NA	NA	NA	NA	NA	NA	NA	no	NA	NA	withdrawn	NA	NA	NA	2017-01-25	schisto_neg	no	NA	NA	NA	NA
TM-L052	13	F	PK20	pk	2016-03-04	2016-06-28	2017-01-25	negative	negative	NA	NA	NA	NA	NA	NA	NA	yes	2017-06-21	2018-02-13	completed	negative	NA	NA	2018-02-13	schisto_neg	no	NA	NA	NA	NA
TM-L053	9	M	PK20	pk	2016-03-03	2016-06-28	2017-01-25	negative	negative	NA	NA	NA	NA	2017-03-31	2017-05-18	2017-06-15	yes	2017-06-21	2018-02-02	completed	negative	NA	NA	2018-02-02	schisto_pos	no	NA	NA	NA	NA
TM-L054	9	F	PK20	pk	2016-03-11	2016-06-21	2017-02-01	positive	positive	V6	NA	11	light	2017-03-31	2017-05-22	2017-06-14	yes	2017-07-26	2018-02-13	completed	negative	NA	NA	2018-02-13	schisto_pos	no	NA	NA	NA	NA
TM-L055	8	M	PK29	pk	2016-04-11	2016-06-29	2017-02-09	negative	negative	NA	NA	NA	NA	NA	NA	NA	yes	2017-07-24	2018-01-29	completed	negative	NA	NA	2018-01-29	schisto_neg	no	NA	NA	NA	NA
TM-L056	14	F	PK29	pk	2016-04-11	2016-06-30	2017-02-09	positive	positive	V6	NA	21	light	2017-05-02	2017-05-22	2017-06-27	yes	2017-07-26	2018-01-29	completed	negative	NA	NA	2018-01-29	schisto_pos	no	NA	NA	NA	NA
TM-L057	7	M	PK29	pk	2016-03-16	2016-06-28	2017-02-09	negative	negative	NA	NA	NA	NA	NA	NA	NA	yes	2017-07-24	2018-01-29	completed	negative	NA	NA	2018-01-29	schisto_neg	no	NA	NA	NA	NA
TM-L058	9	F	PK29	pk	2016-04-07	2016-06-30	2017-02-01	negative	negative	NA	NA	NA	NA	NA	NA	NA	yes	2017-07-12	2018-01-25	completed	negative	NA	NA	2018-01-25	schisto_neg	no	NA	NA	NA	NA
TM-L059	12	M	PK29	pk	2016-04-07	2016-06-30	2017-02-01	positive	positive	V6	NA	3	light	2017-05-02	2017-05-22	2017-06-27	yes	2017-07-12	2018-01-25	completed	negative	NA	NA	2018-01-25	schisto_pos	no	NA	NA	NA	NA
TM-L061	8	M	PK21	pk	2016-03-08	2016-06-28	2017-01-30	negative	negative	NA	NA	NA	NA	NA	NA	NA	yes	2017-07-13	2018-02-13	completed	positive	3	light	2018-02-13	schisto_pos	no	NA	NA	NA	NA
TM-L062	15	M	PK20	pk	2016-03-11	2016-12-13	2016-12-13	NA	NA	NA	NA	NA	NA	NA	NA	NA	no	NA	NA	withdrawn	NA	NA	NA	2016-12-13	NA	no	NA	NA	NA	NA
TM-L063	11	F	PK18	pk	2016-03-10	2016-06-23	2017-01-31	negative	positive	UV	2016-09-27	19	heavy	2016-10-03	NA	NA	yes	2017-06-30	2018-01-30	completed	negative	NA	NA	2018-01-30	schisto_pos	yes	2016-10-03	19	heavy	phase1
TM-L064	12	F	PK18	pk	2016-03-10	2016-06-23	2017-02-02	positive	positive	V6	NA	3	light	2017-03-30	2017-05-18	2017-06-14	yes	2017-07-21	2018-01-30	completed	negative	NA	NA	2018-01-30	schisto_pos	no	NA	NA	NA	NA
TM-L065	10	F	PK18	pk	2016-03-10	2016-06-23	2017-02-02	negative	negative	NA	NA	NA	NA	NA	NA	NA	yes	2017-06-21	2018-01-30	completed	positive	5	light	2018-01-30	schisto_pos	no	NA	NA	NA	NA
TM-L066	7	M	PK18	pk	2016-03-10	2016-07-01	2017-01-31	negative	negative	NA	NA	NA	NA	NA	NA	NA	yes	2017-06-29	2018-01-30	completed	positive	10	light	2018-01-30	schisto_pos	no	NA	NA	NA	NA
TM-L067	7	M	PK18	pk	2016-03-10	2016-06-23	2017-02-08	positive	positive	V6	NA	1	light	2017-04-03	2017-05-18	NA	yes	2017-07-21	2018-02-07	completed	negative	NA	NA	2018-02-07	schisto_pos	no	NA	NA	NA	NA
TM-L068	18	F	PK21	pk	2016-03-24	2016-11-21	2016-11-21	NA	NA	NA	NA	NA	NA	NA	NA	NA	no	NA	NA	withdrawn	NA	NA	NA	2016-11-21	NA	no	NA	NA	NA	NA
TM-L069	11	F	PK18	pk	2016-03-10	2016-07-08	2016-07-08	NA	NA	NA	NA	NA	NA	NA	NA	NA	no	NA	NA	withdrawn	NA	NA	NA	2016-07-08	NA	no	NA	NA	NA	NA
TM-L070	10	F	PK18	pk	2016-03-10	2016-07-08	2016-10-17	NA	negative	NA	NA	NA	NA	NA	NA	NA	no	NA	NA	withdrawn	NA	NA	NA	2016-10-17	schisto_pos	no	NA	NA	NA	NA
TM-L071	10	F	PK10	pk	2016-03-02	2016-06-20	2017-01-31	positive	positive	UV	2016-08-12	33	heavy	2017-03-31	2017-05-19	2017-06-14	yes	2017-07-19	2018-01-26	completed	positive	3	light	2018-01-26	schisto_pos	yes	2016-08-23	33	heavy	phase1
TM-L072	30	F	PK12	pk	2016-03-02	2016-06-20	2017-02-28	negative	negative	NA	NA	NA	NA	NA	NA	NA	yes	2017-07-06	NA	withdrawn	NA	NA	NA	2017-09-26	schisto_neg	no	NA	NA	NA	NA
TM-L073	9	F	PK10	pk	2016-02-26	2016-06-20	2017-01-31	positive	positive	V6	NA	139	heavy	2017-04-20	2017-05-23	2017-06-27	yes	2017-07-19	2018-01-23	completed	positive	4	light	2018-01-23	schisto_pos	no	NA	NA	NA	NA
TM-L074	9	M	PK15	pk	2016-04-12	2016-09-07	2017-02-03	positive	positive	V6	NA	60	heavy	2017-04-03	2017-05-19	2017-06-14	yes	2017-07-21	2018-01-23	completed	positive	5	light	2018-01-23	schisto_pos	no	NA	NA	NA	NA
TM-L075	8	F	PK14	pk	2016-04-11	2016-06-21	2017-02-03	positive	positive	UV	2016-08-11	500	heavy	2017-03-30	2017-05-17	2017-06-14	yes	2017-07-31	2018-01-23	completed	negative	NA	NA	2018-01-23	schisto_pos	yes	2016-08-23	500	heavy	phase1
TM-L076	15	M	PK08	pk	2016-02-25	2016-06-20	2017-01-27	positive	positive	V6	NA	3	light	NA	NA	NA	yes	2017-07-05	NA	withdrawn	NA	NA	NA	2017-11-20	schisto_pos	no	NA	NA	NA	NA
TM-L077	6	M	PK20	pk	2016-03-15	2016-06-20	2017-01-30	negative	negative	NA	NA	NA	NA	NA	NA	NA	yes	2017-07-26	2018-02-01	completed	negative	NA	NA	2018-02-01	schisto_neg	no	NA	NA	NA	NA
TM-L078	12	M	PK20	pk	2016-03-04	2016-07-12	2017-01-30	negative	negative	NA	NA	NA	NA	NA	NA	NA	yes	2017-07-14	2018-02-07	completed	positive	7	light	2018-02-07	schisto_pos	no	NA	NA	NA	NA
TM-L079	7	M	PK20	pk	2016-03-04	2016-06-20	2017-01-30	positive	positive	V6	NA	2	light	2017-03-30	2017-05-18	2017-06-15	yes	2017-07-26	2018-02-13	completed	negative	NA	NA	2018-02-13	schisto_pos	no	NA	NA	NA	NA
TM-L080	9	M	PK20	pk	2016-03-04	2016-06-20	2017-01-30	negative	negative	NA	NA	NA	NA	NA	NA	NA	yes	2017-07-26	2018-02-01	completed	negative	NA	NA	2018-02-01	schisto_neg	no	NA	NA	NA	NA
TM-L081	14	M	PK20	pk	2016-04-04	2016-07-12	2017-02-23	negative	negative	NA	NA	NA	NA	NA	NA	NA	no	NA	NA	withdrawn	NA	NA	NA	2017-02-23	schisto_neg	no	NA	NA	NA	NA
TM-L082	9	M	PK22	pk	2016-03-04	2016-06-28	2017-01-30	negative	positive	UV	2016-07-29	10	heavy	2016-08-05	2016-09-05	2016-10-05	yes	2017-07-13	2018-02-15	completed	negative	NA	NA	2018-02-15	schisto_pos	yes	2016-08-04	10	heavy	phase1
TM-L083	14	F	PK22	pk	2016-03-04	2016-07-28	2017-01-30	positive	positive	V6	NA	2	light	2017-03-30	2017-05-18	2017-06-15	yes	2017-07-13	2018-02-14	completed	negative	NA	NA	2018-02-14	schisto_pos	no	NA	NA	NA	NA
TM-L084	11	F	PK22	pk	2016-03-04	2016-06-29	2017-01-30	negative	negative	NA	NA	NA	NA	NA	NA	NA	yes	2017-07-13	2018-02-15	completed	negative	NA	NA	2018-02-15	schisto_neg	no	NA	NA	NA	NA
TM-L085	14	M	PK14	pk	2016-04-11	2016-07-07	2017-02-10	positive	positive	V6	2016-11-16	500	heavy	2017-03-30	2017-05-17	NA	yes	2017-08-10	2018-02-23	completed	positive	6	light	2018-02-23	schisto_pos	yes	NA	NA	NA	NA
TM-L086	15	M	PK15	pk	2016-04-12	2016-06-20	2017-02-24	positive	positive	V6	NA	136	heavy	2017-05-23	2017-06-29	NA	yes	2017-07-31	NA	withdrawn	NA	NA	NA	2017-07-31	schisto_pos	no	NA	NA	NA	NA
TM-L087	12	M	PK15	pk	2016-03-02	2016-06-21	2017-02-03	positive	positive	V6	NA	55	heavy	2017-03-30	2017-05-19	NA	yes	2017-07-21	NA	withdrawn	NA	NA	NA	2017-07-21	schisto_pos	no	NA	NA	NA	NA
TM-L088	19	M	PK15	pk	2016-03-02	2016-07-01	2017-02-16	positive	positive	V6	NA	73	heavy	2017-04-18	2017-05-22	NA	no	NA	NA	withdrawn	NA	NA	NA	2017-02-16	schisto_pos	no	NA	NA	NA	NA
TM-L089	11	M	PK16	pk	2016-03-07	2016-06-21	2017-02-03	negative	positive	UV	2016-05-23	108	heavy	2016-05-26	2016-07-14	2016-08-14	yes	2017-07-06	2018-03-06	completed	positive	16	light	2018-03-06	schisto_pos	yes	2016-05-26	108	heavy	phase1
TM-L090	10	F	PK21	pk	2016-03-08	2016-06-28	2017-02-01	positive	positive	V6	NA	18	light	2017-04-04	2017-05-18	2017-06-15	yes	2017-07-17	2018-02-14	completed	negative	NA	NA	2018-02-14	schisto_pos	no	NA	NA	NA	NA
TM-L091	8	F	PK21	pk	2016-03-08	2016-06-28	2017-02-01	positive	positive	V6	NA	2	light	2017-03-30	2017-05-18	2017-06-15	yes	2017-07-14	2018-02-14	completed	negative	NA	NA	2018-02-14	schisto_pos	no	NA	NA	NA	NA
TM-L092	13	F	PK20	pk	2016-03-04	2016-06-28	2017-02-15	negative	negative	NA	NA	NA	NA	NA	NA	NA	yes	2017-07-13	2018-02-06	completed	negative	NA	NA	2018-02-06	schisto_neg	no	NA	NA	NA	NA
TM-L093	13	M	PK16	pk	2016-03-07	2016-06-21	2017-02-21	positive	positive	UV	2016-05-24	20	heavy	2017-04-03	2017-05-18	2017-06-29	yes	2017-07-25	2018-03-29	completed	negative	NA	NA	2018-03-29	schisto_pos	yes	2016-05-24	20	heavy	phase1
TM-L094	14	M	PK18	pk	2016-03-04	2016-06-23	2017-02-02	positive	positive	V6	NA	8	light	2017-04-03	2017-05-18	2017-06-15	yes	2017-08-28	2018-02-13	completed	negative	NA	NA	2018-02-13	schisto_pos	no	NA	NA	NA	NA
TM-L095	8	M	PK18	pk	2016-03-04	2016-06-23	2017-02-02	positive	positive	V6	NA	5	light	2017-03-30	2017-05-18	2017-06-14	yes	2017-07-21	2018-01-30	completed	negative	NA	NA	2018-01-30	schisto_pos	no	NA	NA	NA	NA
TM-L096	10	M	PK18	pk	2016-03-04	2016-06-23	2017-02-02	positive	positive	V6	NA	2	light	2017-03-30	2017-05-18	2017-06-14	yes	2017-07-21	2018-01-30	completed	negative	NA	NA	2018-01-30	schisto_pos	no	NA	NA	NA	NA
TM-L097	9	M	PK08	pk	2016-03-03	2016-06-21	2016-08-11	NA	NA	NA	NA	NA	NA	NA	NA	NA	yes	2017-08-11	NA	withdrawn	NA	NA	NA	2017-09-13	NA	no	NA	NA	NA	NA
TM-L098	10	M	PK08	pk	2016-03-03	2016-06-21	2016-11-18	NA	NA	NA	NA	NA	NA	NA	NA	NA	yes	2017-07-06	NA	withdrawn	NA	NA	NA	2017-09-13	NA	no	NA	NA	NA	NA
TM-L099	16	M	PK27	pk	2016-03-08	2016-07-14	2016-07-14	NA	NA	NA	NA	NA	NA	NA	NA	NA	no	NA	NA	withdrawn	NA	NA	NA	2016-07-14	NA	no	NA	NA	NA	NA
TM-L100	6	F	PK20	pk	2016-03-14	2016-06-28	2017-02-07	positive	positive	UV	2016-08-25	500	heavy	2017-04-18	2017-05-22	NA	yes	2017-07-31	2018-02-19	completed	positive	267	heavy	2018-02-19	schisto_pos	yes	2016-09-09	500	heavy	phase1
TM-L102	12	F	PK18	pk	2016-03-04	2016-06-23	2017-02-02	positive	positive	V6	NA	11	light	2017-04-03	2017-05-18	2017-06-15	yes	2017-07-21	2018-02-09	completed	negative	NA	NA	2018-02-09	schisto_pos	no	NA	NA	NA	NA
TM-L103	9	F	PK18	pk	2016-03-04	2016-07-01	2017-02-02	positive	positive	V6	NA	9	light	2017-04-18	2017-05-22	2017-06-27	yes	2017-07-21	NA	withdrawn	NA	NA	NA	2017-12-22	schisto_pos	no	NA	NA	NA	NA
TM-L104	11	F	PK08	pk	2016-03-03	2016-06-21	2017-01-31	negative	negative	NA	NA	NA	NA	NA	NA	NA	yes	2017-07-06	NA	withdrawn	NA	NA	NA	2017-09-13	schisto_neg	no	NA	NA	NA	NA
TM-L105	11	M	PK08	pk	2016-03-03	2016-06-21	2016-08-11	NA	NA	NA	NA	NA	NA	NA	NA	NA	yes	2017-08-11	NA	withdrawn	NA	NA	NA	2017-09-13	NA	no	NA	NA	NA	NA
TM-L106	8	M	PK08	pk	2016-03-03	2016-06-21	2017-01-31	negative	negative	NA	NA	NA	NA	NA	NA	NA	yes	2017-07-06	NA	withdrawn	NA	NA	NA	2017-09-13	schisto_neg	no	NA	NA	NA	NA
TM-L107	7	M	PK21	pk	2016-03-15	2016-06-21	2016-11-24	negative	negative	NA	NA	NA	NA	NA	NA	NA	no	NA	NA	withdrawn	NA	NA	NA	2016-11-24	schisto_neg	no	NA	NA	NA	NA
TM-L108	15	M	PK33	pk	2016-03-07	2016-06-30	2017-02-07	negative	negative	NA	NA	NA	NA	NA	NA	NA	yes	2017-07-07	2018-01-25	completed	negative	NA	NA	2018-01-25	schisto_neg	no	NA	NA	NA	NA
TM-L109	7	F	PK21	pk	2016-03-04	2016-06-21	2017-02-28	negative	negative	NA	NA	NA	NA	NA	NA	NA	yes	2017-07-18	2018-02-15	completed	negative	NA	NA	2018-02-15	schisto_neg	no	NA	NA	NA	NA
TM-L110	10	M	PK33	pk	2016-04-07	2016-07-08	2017-05-24	positive	positive	V6	NA	7	light	2017-04-25	2017-05-22	2017-06-27	no	NA	NA	withdrawn	NA	NA	NA	2017-05-24	schisto_pos	no	NA	NA	NA	NA
TM-L111	11	M	PK33	pk	2016-03-08	2016-06-30	2017-02-07	negative	negative	NA	NA	NA	NA	NA	NA	NA	yes	2017-07-10	2018-01-25	completed	negative	NA	NA	2018-01-25	schisto_neg	no	NA	NA	NA	NA
TM-L112	14	F	PK33	pk	2016-03-08	2016-06-30	2017-02-07	negative	negative	NA	NA	NA	NA	NA	NA	NA	yes	2017-07-10	2018-01-25	completed	negative	NA	NA	2018-01-25	schisto_neg	no	NA	NA	NA	NA
TM-L113	9	F	PK33	pk	2016-03-08	2016-06-30	2017-02-07	negative	negative	NA	NA	NA	NA	NA	NA	NA	yes	2017-07-10	2018-01-29	completed	negative	NA	NA	2018-01-29	schisto_neg	no	NA	NA	NA	NA
TM-L114	7	F	PK33	pk	2016-04-07	2016-06-30	2017-02-07	negative	negative	NA	NA	NA	NA	NA	NA	NA	yes	2017-07-10	2018-01-25	completed	negative	NA	NA	2018-01-25	schisto_neg	no	NA	NA	NA	NA
TM-L115	13	M	PK33	pk	2016-03-08	2016-06-30	2017-02-07	negative	negative	NA	NA	NA	NA	NA	NA	NA	yes	2017-07-31	2018-02-05	completed	negative	NA	NA	2018-02-05	schisto_neg	no	NA	NA	NA	NA
TM-L120	12	F	PK33	pk	2016-03-22	2016-06-29	2017-02-07	negative	negative	NA	NA	NA	NA	NA	NA	NA	yes	2017-07-07	2018-02-23	completed	negative	NA	NA	2018-02-23	schisto_neg	no	NA	NA	NA	NA
TM-L122	6	F	PK33	pk	2016-03-04	2016-06-29	2017-02-07	negative	negative	NA	NA	NA	NA	NA	NA	NA	yes	2017-07-07	2018-01-25	completed	negative	NA	NA	2018-01-25	schisto_neg	no	NA	NA	NA	NA
TM-L123	9	M	PK33	pk	2016-03-04	2016-06-29	2017-02-07	negative	negative	NA	NA	NA	NA	NA	NA	NA	yes	2017-07-07	2018-01-25	completed	negative	NA	NA	2018-01-25	schisto_neg	no	NA	NA	NA	NA
TM-L125	13	F	PK20	pk	2016-03-22	2016-06-28	2017-02-15	negative	negative	NA	NA	NA	NA	NA	NA	NA	yes	2017-07-26	2018-02-09	completed	negative	NA	NA	2018-02-09	schisto_neg	no	NA	NA	NA	NA
TM-L129	11	F	PK15	pk	2016-03-01	2016-06-20	2016-08-19	NA	NA	NA	NA	NA	NA	NA	NA	NA	no	NA	NA	withdrawn	NA	NA	NA	2016-08-19	NA	no	NA	NA	NA	NA
TM-L130	14	M	PK20	pk	2016-03-14	2016-07-12	2017-01-25	positive	positive	V6	NA	14	light	2017-04-04	2017-05-22	2017-06-15	yes	2017-07-26	2018-02-07	completed	negative	NA	NA	2018-02-07	schisto_pos	no	NA	NA	NA	NA
TM-L131	13	M	PK20	pk	2016-03-14	2016-07-28	2017-01-25	negative	negative	NA	NA	NA	NA	NA	NA	NA	yes	2017-07-26	2018-01-29	completed	negative	NA	NA	2018-01-29	schisto_neg	no	NA	NA	NA	NA
TM-L132	11	F	PK20	pk	2016-03-15	2016-07-12	2017-01-25	negative	negative	NA	NA	NA	NA	NA	NA	NA	yes	2017-07-26	NA	withdrawn	NA	NA	NA	2017-07-26	schisto_neg	no	NA	NA	NA	NA
TM-L133	9	M	PK20	pk	2016-03-24	2016-06-20	2017-01-25	negative	negative	NA	NA	NA	NA	NA	NA	NA	yes	2017-07-31	2018-01-29	completed	negative	NA	NA	2018-01-29	schisto_neg	no	NA	NA	NA	NA
TM-L134	9	M	PK10	pk	2016-02-25	2016-06-20	2017-02-10	positive	positive	V6	NA	182	heavy	2017-04-03	2017-05-18	2017-06-19	yes	2017-08-21	2018-01-26	completed	negative	NA	NA	2018-01-26	schisto_pos	no	NA	NA	NA	NA
TM-L135	7	M	PK29	pk	2016-04-07	2016-06-28	2017-02-09	negative	negative	NA	NA	NA	NA	NA	NA	NA	yes	2017-07-24	2018-02-01	completed	negative	NA	NA	2018-02-01	schisto_neg	no	NA	NA	NA	NA
TM-L136	16	M	SIAT	pk	2016-03-18	2016-06-28	2017-02-16	positive	positive	UV	2016-08-05	232	heavy	2017-03-31	2017-05-17	2017-06-15	yes	2017-11-03	2018-01-26	completed	positive	2	light	2018-01-26	schisto_pos	yes	2016-08-23	13	heavy	phase1
TM-L137	10	M	SIAT	pk	2016-03-18	2016-06-28	2017-02-10	positive	positive	UV	2016-08-23	500	heavy	2017-04-24	2017-05-19	2017-06-15	yes	2017-07-21	2018-01-26	completed	positive	5	light	2018-01-26	schisto_pos	yes	2016-09-13	500	heavy	phase1
TM-L138	13	M	SIAT	pk	2016-03-18	2016-06-28	2017-02-10	positive	positive	V6	NA	17	light	2017-03-31	2017-05-17	2017-06-15	yes	2017-07-21	2018-01-23	completed	positive	2	light	2018-01-23	schisto_pos	no	NA	NA	NA	NA
TM-L139	10	F	PK20	pk	2016-03-24	2016-06-20	2016-06-20	NA	NA	NA	NA	NA	NA	NA	NA	NA	no	NA	NA	withdrawn	NA	NA	NA	2016-06-20	NA	no	NA	NA	NA	NA
TM-L140	14	F	PK20	pk	2016-03-14	2016-06-29	2016-10-28	NA	NA	NA	NA	NA	NA	NA	NA	NA	no	NA	NA	withdrawn	NA	NA	NA	2016-10-28	NA	no	NA	NA	NA	NA
TM-L141	13	F	PK20	pk	2016-03-16	2016-06-20	2017-02-07	negative	negative	NA	NA	NA	NA	NA	NA	NA	yes	2017-07-27	NA	withdrawn	NA	NA	NA	2017-09-28	schisto_neg	no	NA	NA	NA	NA
TM-L142	7	M	PK15	pk	2016-03-02	2016-06-20	2017-02-03	positive	positive	V6	NA	213	heavy	2017-04-03	2017-05-17	2017-06-14	yes	2017-07-21	2018-01-23	completed	positive	99	heavy	2018-01-23	schisto_pos	no	NA	NA	NA	NA
TM-L144	13	M	PK21	pk	2016-03-24	2016-07-12	2017-02-01	positive	positive	V6	NA	3	light	2017-04-04	2017-05-22	2017-06-27	yes	2017-07-13	2018-02-13	completed	negative	NA	NA	2018-02-13	schisto_pos	no	NA	NA	NA	NA
TM-L145	18	M	SIAT	pk	2016-03-18	2016-07-01	2017-02-08	positive	positive	V6	NA	4	light	2017-03-31	2017-05-19	2017-06-14	yes	2017-07-20	2018-02-02	completed	negative	NA	NA	2018-02-02	schisto_pos	no	NA	NA	NA	NA
TM-L146	13	F	PK18	pk	2016-03-10	2016-09-08	2017-02-20	positive	positive	V6	NA	500	heavy	2017-03-30	2017-05-18	2017-06-14	yes	2017-07-25	2018-02-09	completed	negative	NA	NA	2018-02-09	schisto_pos	no	NA	NA	NA	NA
TM-L147	15	M	SIAT	pk	2016-03-18	2016-06-21	2017-02-08	positive	positive	UV	2016-06-29	500	heavy	2017-03-31	2017-05-18	2017-06-14	yes	2017-10-12	2018-02-21	completed	negative	NA	NA	2018-02-21	schisto_pos	yes	2016-06-29	500	heavy	phase1
TM-L148	8	F	SIAT	pk	2016-04-07	2016-06-28	2017-02-16	positive	positive	UV	2016-09-07	500	heavy	2016-09-26	NA	NA	yes	2017-07-04	2018-01-26	completed	negative	NA	NA	2018-01-26	schisto_pos	yes	2016-08-26	500	heavy	phase1
TM-L149	15	M	SIAT	pk	2016-04-07	2016-06-28	2017-02-20	negative	positive	UV	2016-08-11	265	heavy	2016-08-23	2016-09-22	NA	yes	2017-07-05	2018-03-09	completed	negative	NA	NA	2018-03-09	schisto_pos	yes	2016-08-23	265	heavy	phase1
TM-L150	18	M	SIAT	pk	2016-04-07	2016-08-23	2016-12-16	negative	negative	NA	NA	NA	NA	NA	NA	NA	yes	2017-08-08	NA	withdrawn	NA	NA	NA	2017-09-12	schisto_neg	no	NA	NA	NA	NA
TM-L151	19	F	SIAT	pk	2016-04-07	2016-06-20	2017-02-16	positive	positive	UV	2016-07-01	29	heavy	2017-03-30	2017-05-19	2017-06-14	yes	2017-10-30	2018-02-19	completed	negative	NA	NA	2018-02-19	schisto_pos	yes	2016-07-01	29	heavy	phase1
TM-L152	19	F	PK10	pk	2016-03-02	2016-06-20	2017-02-03	positive	positive	V6	NA	101	heavy	2017-04-24	2017-05-18	2017-06-15	yes	2017-07-18	2018-02-02	completed	negative	NA	NA	2018-02-02	schisto_pos	no	NA	NA	NA	NA
TM-L153	10	M	SIAT	pk	2016-03-18	2016-06-28	2017-02-03	positive	positive	UV	2016-07-07	26	heavy	2017-04-20	2017-05-22	2017-06-29	yes	2017-07-20	2018-02-09	completed	positive	10	light	2018-02-09	schisto_pos	yes	2016-07-29	26	heavy	phase1
TM-L154	12	F	SIAT	pk	2016-03-18	2016-09-15	2016-09-15	NA	NA	NA	NA	NA	NA	NA	NA	NA	no	NA	NA	withdrawn	NA	NA	NA	2016-09-15	NA	no	NA	NA	NA	NA
TM-L155	14	F	SIAT	pk	2016-03-18	2016-06-28	2016-12-15	negative	negative	NA	NA	NA	NA	NA	NA	NA	no	NA	NA	withdrawn	NA	NA	NA	2016-12-15	schisto_neg	no	NA	NA	NA	NA
TM-L156	12	M	SIAT	pk	2016-03-18	2016-06-28	2017-02-10	positive	positive	V6	NA	26	light	2017-04-06	2017-05-22	2017-06-27	yes	2017-07-19	2018-02-09	completed	positive	12	light	2018-02-09	schisto_pos	no	NA	NA	NA	NA
TM-L157	9	M	SIAT	pk	2016-03-18	2016-06-28	2017-02-10	positive	positive	V6	NA	2	light	2017-03-31	2017-05-18	2017-06-14	yes	2017-07-31	2018-01-26	completed	positive	1	light	2018-01-26	schisto_pos	no	NA	NA	NA	NA
TM-L158	15	F	SIAT	pk	2016-03-18	2016-06-28	2017-02-22	positive	positive	V6	NA	8	light	2017-03-31	2017-05-22	2017-06-27	yes	2017-07-19	2018-02-06	completed	negative	NA	NA	2018-02-06	schisto_pos	no	NA	NA	NA	NA
TM-L159	15	F	SIAT	pk	2016-03-30	2016-06-30	2017-02-14	positive	positive	V6	NA	33	light	NA	NA	NA	yes	2017-07-03	2018-02-08	completed	negative	NA	NA	2018-02-08	schisto_pos	no	NA	NA	NA	NA
TM-L160	14	F	PK10	pk	2016-02-25	2016-06-29	2016-11-16	NA	NA	NA	NA	NA	NA	NA	NA	NA	no	NA	NA	withdrawn	NA	NA	NA	2016-11-16	NA	no	NA	NA	NA	NA
TM-L161	10	F	PK10	pk	2016-02-25	2016-06-20	2016-08-11	NA	NA	NA	NA	NA	NA	NA	NA	NA	no	NA	NA	withdrawn	NA	NA	NA	2016-08-11	NA	no	NA	NA	NA	NA
TM-L162	9	F	PK10	pk	2016-02-25	2016-06-20	2017-01-27	NA	NA	NA	NA	NA	NA	NA	NA	NA	yes	2017-07-06	NA	withdrawn	NA	NA	NA	2017-11-22	NA	no	NA	NA	NA	NA
TM-L163	17	M	PK18	pk	2016-03-04	2016-07-08	2016-07-08	NA	NA	NA	NA	NA	NA	NA	NA	NA	no	NA	NA	withdrawn	NA	NA	NA	2016-07-08	NA	no	NA	NA	NA	NA
TM-L164	13	M	SIAT	pk	2016-03-30	2016-06-28	2017-02-08	positive	positive	V6	NA	59	heavy	2017-03-31	2017-05-17	2017-06-14	yes	2017-08-31	2018-02-12	completed	negative	NA	NA	2018-02-12	schisto_pos	no	NA	NA	NA	NA
TM-L165	11	M	SIAT	pk	2016-03-30	2016-11-22	2017-02-08	positive	positive	V6	NA	18	light	2017-05-22	NA	NA	yes	2017-08-31	2018-02-08	completed	negative	NA	NA	2018-02-08	schisto_pos	no	NA	NA	NA	NA
TM-L166	18	M	SIAT	pk	2016-03-30	2016-06-30	2017-02-14	positive	positive	UV	2016-09-08	37	heavy	2016-09-20	NA	NA	yes	2017-07-03	2018-03-23	completed	negative	NA	NA	2018-03-23	schisto_pos	yes	2016-09-20	37	heavy	phase1
TM-L167	11	F	SIAT	pk	2016-03-30	2016-10-26	2017-02-10	negative	negative	NA	NA	NA	NA	NA	NA	NA	yes	2017-07-03	NA	withdrawn	NA	NA	NA	2017-08-31	schisto_neg	no	NA	NA	NA	NA
TM-L168	8	M	PK10	pk	2016-02-25	2016-06-21	2017-01-27	negative	negative	NA	NA	NA	NA	NA	NA	NA	yes	2017-07-06	NA	withdrawn	NA	NA	NA	2017-11-29	schisto_neg	no	NA	NA	NA	NA
TM-L169	22	F	PK12	pk	2016-03-02	2016-06-20	2017-01-31	negative	positive	UV	2016-09-08	5	heavy	2016-09-21	2016-10-24	NA	yes	2017-06-30	2018-02-02	completed	negative	NA	NA	2018-02-02	schisto_pos	yes	2016-10-21	5	heavy	phase1
TM-L170	8	F	PK15	pk	2016-03-01	2016-06-21	2017-02-02	negative	positive	UV	2016-10-11	500	heavy	2016-10-11	NA	NA	yes	2017-07-05	2018-01-23	completed	positive	37	light	2018-01-23	schisto_pos	yes	2016-10-11	500	heavy	phase1
TM-L171	15	M	SIAT	pk	2016-03-18	2016-06-28	2017-02-02	positive	positive	V6	NA	288	heavy	2017-03-31	2017-05-17	2017-06-14	yes	2017-07-20	2018-02-02	completed	negative	NA	NA	2018-02-02	schisto_pos	no	NA	NA	NA	NA
TM-L172	11	F	St_MARTIN	pk	2016-06-03	2016-07-29	2017-01-26	negative	negative	NA	NA	NA	NA	NA	NA	NA	yes	2017-07-05	2018-03-27	completed	negative	NA	NA	2018-03-27	schisto_neg	no	NA	NA	NA	NA
TM-L173	16	F	St_MARTIN	pk	2016-06-03	2016-11-22	2017-01-26	negative	negative	NA	NA	NA	NA	NA	NA	NA	yes	2017-07-05	2018-01-26	completed	negative	NA	NA	2018-01-26	schisto_neg	no	NA	NA	NA	NA
TM-L174	14	F	St_MARTIN	pk	2016-06-03	2016-07-29	2017-01-27	negative	positive	UV	2016-08-30	211	heavy	2016-09-13	2016-10-24	NA	yes	2017-07-05	2018-01-26	completed	negative	NA	NA	2018-01-26	schisto_pos	yes	2016-09-13	211	heavy	phase1
TM-L175	13	M	St_MARTIN	pk	2016-06-03	2016-06-30	2017-01-27	positive	positive	V6	NA	18	light	2017-04-03	2017-05-18	NA	yes	2017-07-31	NA	withdrawn	NA	NA	NA	2017-12-11	schisto_pos	no	NA	NA	NA	NA
TM-L176	9	F	St_MARTIN	pk	2016-06-03	2016-06-30	2017-01-27	negative	negative	NA	NA	NA	NA	NA	NA	NA	yes	2017-07-31	NA	withdrawn	NA	NA	NA	2017-12-12	schisto_neg	no	NA	NA	NA	NA
TM-L177	10	F	St_MARTIN	pk	2016-06-02	2016-07-27	2017-01-27	negative	negative	NA	NA	NA	NA	NA	NA	NA	yes	2017-07-05	2018-02-02	completed	negative	NA	NA	2018-02-02	schisto_neg	no	NA	NA	NA	NA
TM-L179	12	M	St_MARTIN	pk	2016-06-02	2016-06-30	2017-01-26	negative	negative	NA	NA	NA	NA	NA	NA	NA	yes	2017-07-05	2018-02-21	completed	positive	3	light	2018-02-21	schisto_pos	no	NA	NA	NA	NA
TM-L180	7	M	St_MARTIN	pk	2016-06-02	2016-06-30	2017-01-26	negative	negative	NA	NA	NA	NA	NA	NA	NA	yes	2017-07-05	2018-02-02	completed	negative	NA	NA	2018-02-02	schisto_neg	no	NA	NA	NA	NA
TM-L181	7	F	St_MARTIN	pk	2016-06-03	2016-06-30	2017-01-26	positive	positive	UV	2016-08-25	4	heavy	2017-04-03	2017-05-18	2017-06-15	yes	2017-07-31	NA	withdrawn	NA	NA	NA	2017-12-12	schisto_pos	yes	2016-10-04	4	heavy	phase1
TM-L182	13	M	St_MARTIN	pk	2016-06-02	2016-06-30	2017-01-26	negative	negative	NA	NA	NA	NA	NA	NA	NA	yes	2017-07-05	2018-02-22	completed	negative	NA	NA	2018-02-22	schisto_neg	no	NA	NA	NA	NA
TM-L183	10	F	St_MARTIN	pk	2016-06-08	2016-07-05	2017-01-26	negative	positive	UV	2016-09-27	80	heavy	2016-10-05	NA	NA	yes	2017-07-05	2018-02-06	completed	negative	NA	NA	2018-02-06	schisto_pos	yes	2016-10-04	80	heavy	phase1
TM-L184	15	M	St_MARTIN	pk	2016-06-08	2016-07-07	2017-01-26	positive	positive	UV	2016-10-14	500	heavy	NA	NA	NA	no	NA	NA	withdrawn	NA	NA	NA	2017-01-26	schisto_pos	no	2016-10-14	NA	heavy	phase1
TM-L185	12	F	SIAT	pk	2016-06-09	2016-07-13	2017-02-08	positive	positive	V6	NA	15	light	2017-03-31	2017-05-19	2017-06-14	yes	2017-07-19	NA	withdrawn	NA	NA	NA	2017-09-22	schisto_pos	no	NA	NA	NA	NA
TM-L186	11	M	PK29	pk	2016-06-08	2016-07-13	2017-02-01	negative	negative	NA	NA	NA	NA	NA	NA	NA	yes	2017-07-12	2018-01-29	completed	negative	NA	NA	2018-01-29	schisto_neg	no	NA	NA	NA	NA
TM-L187	12	M	St_MARTIN	pk	2016-06-08	2016-07-12	2017-02-22	negative	negative	NA	NA	NA	NA	NA	NA	NA	yes	2017-07-05	NA	withdrawn	NA	NA	NA	2017-12-26	schisto_neg	no	NA	NA	NA	NA
TM-L188	9	F	SIAT	pk	2016-06-09	2016-07-13	2017-02-08	positive	positive	V6	NA	2	light	2017-03-31	2017-05-19	2017-06-14	yes	2017-07-19	2018-01-26	completed	positive	31	light	2018-01-26	schisto_pos	no	NA	NA	NA	NA
TM-L189	23	F	SIAT	pk	2016-06-09	2016-07-25	2017-02-02	positive	positive	V6	NA	2	light	2017-05-23	NA	NA	no	NA	NA	withdrawn	NA	NA	NA	2017-02-02	schisto_pos	no	NA	NA	NA	NA
TM-L190	7	M	St_MARTIN	pk	2016-06-08	2016-07-05	2017-01-26	positive	positive	V6	NA	36	light	2017-04-20	2017-05-18	2017-06-29	yes	2017-07-19	2018-02-06	completed	positive	3	light	2018-02-06	schisto_pos	no	NA	NA	NA	NA
TM-L191	9	M	St_MARTIN	pk	2016-06-08	2016-06-30	2017-01-26	positive	positive	UV	2016-08-09	96	heavy	2017-04-03	2017-05-18	2017-06-15	yes	2017-07-19	2018-02-06	completed	negative	NA	NA	2018-02-06	schisto_pos	yes	2016-09-13	96	heavy	phase1
TM-L192	10	M	PK33	pk	2016-06-15	2016-07-18	2016-09-14	NA	NA	NA	NA	NA	NA	NA	NA	NA	no	NA	NA	withdrawn	NA	NA	NA	2016-09-14	NA	no	NA	NA	NA	NA
TM-L193	12	M	SIAT	pk	2016-06-15	2016-07-13	2017-02-03	positive	positive	V6	NA	27	light	2017-04-06	2017-05-19	2017-06-15	yes	2017-07-19	NA	withdrawn	NA	NA	NA	2017-08-08	schisto_pos	no	NA	NA	NA	NA
TM-L194	19	F	SIAT	pk	2016-06-09	2016-07-14	2017-02-03	negative	positive	UV	2016-08-09	387	heavy	2016-09-13	2016-10-24	NA	yes	2017-07-06	NA	withdrawn	NA	NA	NA	2017-08-31	schisto_pos	yes	2016-09-13	387	heavy	phase1
TM-L195	13	M	St_MARTIN	pk	2016-06-02	2016-07-12	2017-01-26	positive	positive	UV	2016-10-17	3	heavy	2017-04-24	2017-05-24	2017-06-27	yes	2017-07-19	NA	withdrawn	NA	NA	NA	2017-08-22	schisto_pos	no	2016-10-17	NA	heavy	phase1
TM-L196	6	F	SIAT	pk	2016-06-15	2016-07-13	2017-01-31	positive	positive	UV	2016-08-11	298	heavy	2016-09-20	2016-10-24	NA	yes	2017-06-23	NA	withdrawn	NA	NA	NA	2017-08-02	schisto_pos	yes	2016-09-20	218	heavy	phase1
TM-L197	10	M	St_MARTIN	pk	2016-06-10	2016-11-08	2016-11-08	NA	NA	NA	NA	NA	NA	NA	NA	NA	no	NA	NA	withdrawn	NA	NA	NA	2016-11-08	NA	no	NA	NA	NA	NA
TM-L198	13	F	SIAT	pk	2016-06-10	2016-07-13	2017-02-10	positive	positive	V6	NA	33	light	2017-04-24	2017-05-19	2017-06-15	yes	2017-07-20	2018-03-15	completed	negative	NA	NA	2018-03-15	schisto_pos	no	NA	NA	NA	NA
TM-L199	6	M	PK33	pk	2016-06-15	2016-07-13	2016-11-10	negative	negative	NA	NA	NA	NA	NA	NA	NA	yes	2017-07-14	2018-01-25	completed	negative	NA	NA	2018-01-25	schisto_neg	no	NA	NA	NA	NA
TM-L200	10	M	St_MARTIN	pk	2016-06-10	2016-07-12	2017-01-27	positive	positive	V6	NA	3	light	NA	NA	NA	yes	2017-08-03	2018-01-23	completed	negative	NA	NA	2018-01-23	schisto_pos	no	NA	NA	NA	NA
TM-L201	26	M	PK33	pk	2016-11-10	2017-03-17	2017-09-29	negative	negative	NA	NA	NA	NA	NA	NA	NA	yes	2018-03-28	2018-10-03	completed	negative	NA	NA	2018-10-03	schisto_neg	no	NA	NA	NA	NA
TM-L202	10	F	PK33	pk	2016-11-10	2017-03-06	2017-09-29	negative	negative	NA	NA	NA	NA	NA	NA	NA	yes	2018-03-28	2018-10-03	completed	negative	NA	NA	2018-10-03	schisto_neg	no	NA	NA	NA	NA
TM-L203	6	F	PK33	pk	2016-11-10	2017-03-06	2017-09-29	negative	negative	NA	NA	NA	NA	NA	NA	NA	yes	2018-03-28	2018-10-01	completed	negative	NA	NA	2018-10-01	schisto_neg	no	NA	NA	NA	NA
TM-L204	14	M	PK29	pk	2016-11-10	2017-03-24	2017-10-16	positive	positive	UV	2017-03-09	3	heavy	2017-05-12	2017-06-10	2017-07-14	yes	2018-03-27	2018-09-27	completed	negative	NA	NA	2018-09-27	schisto_pos	yes	2017-05-12	3	heavy	phase1
TM-L205	7	F	PK29	pk	2016-11-10	2017-03-09	2017-05-04	NA	NA	NA	NA	NA	NA	NA	NA	NA	no	NA	NA	withdrawn	NA	NA	NA	2017-05-04	NA	no	NA	NA	NA	NA
TM-L206	23	F	PK29	pk	2016-11-16	2017-03-09	2017-05-26	NA	NA	NA	NA	NA	NA	NA	NA	NA	no	NA	NA	withdrawn	NA	NA	NA	2017-05-26	NA	no	NA	NA	NA	NA
TM-L207	7	M	PK29	pk	2016-11-10	2017-03-09	2017-06-16	NA	NA	NA	NA	NA	NA	NA	NA	NA	no	NA	NA	withdrawn	NA	NA	NA	2017-06-16	NA	no	NA	NA	NA	NA
TM-L208	7	M	St_MARTIN	pk	2016-11-15	2017-03-03	2017-09-20	negative	negative	NA	NA	NA	NA	NA	NA	NA	yes	2018-03-27	2018-09-27	completed	negative	NA	NA	2018-09-27	schisto_neg	no	NA	NA	NA	NA
TM-L209	8	M	St_MARTIN	pk	2016-11-15	2017-03-03	2017-09-20	negative	negative	NA	NA	NA	NA	NA	NA	NA	yes	2018-03-27	2018-09-27	completed	negative	NA	NA	2018-09-27	schisto_neg	no	NA	NA	NA	NA
TM-L211	9	F	St_MARTIN	pk	2016-11-15	2017-03-14	2017-09-20	positive	positive	V6	NA	2	light	2017-11-09	NA	NA	yes	2018-03-23	2018-09-25	completed	negative	NA	NA	2018-09-25	schisto_pos	no	NA	NA	NA	NA
TM-L212	11	F	St_MARTIN	pk	2016-11-15	2017-03-14	2017-09-20	negative	negative	NA	NA	NA	NA	NA	NA	NA	yes	2018-03-23	2018-09-25	completed	negative	NA	NA	2018-09-25	schisto_neg	no	NA	NA	NA	NA
TM-L213	6	F	PK27	pk	2016-11-16	2017-03-10	2017-04-12	NA	NA	NA	NA	NA	NA	NA	NA	NA	no	NA	NA	withdrawn	NA	NA	NA	2017-04-12	NA	no	NA	NA	NA	NA
TM-L214	11	F	PK27	pk	2016-11-17	2017-03-27	2017-08-14	negative	negative	NA	NA	NA	NA	NA	NA	NA	no	NA	NA	withdrawn	NA	NA	NA	2017-08-14	schisto_neg	no	NA	NA	NA	NA
TM-L215	12	M	PK33	pk	2016-11-16	2017-03-15	2017-10-03	negative	negative	NA	NA	NA	NA	NA	NA	NA	yes	2018-03-28	2018-10-05	completed	negative	NA	NA	2018-10-05	schisto_neg	no	NA	NA	NA	NA
TM-L216	12	F	PK33	pk	2016-11-16	2017-03-15	2017-10-03	negative	negative	NA	NA	NA	NA	NA	NA	NA	yes	2018-03-28	2018-10-05	completed	negative	NA	NA	2018-10-05	schisto_neg	no	NA	NA	NA	NA
TM-L217	7	F	PK33	pk	2016-11-16	2017-03-13	2017-10-03	negative	negative	NA	NA	NA	NA	NA	NA	NA	yes	2018-03-28	2018-10-05	completed	negative	NA	NA	2018-10-05	schisto_neg	no	NA	NA	NA	NA
TM-L218	17	F	SIAT	pk	2016-11-29	2017-03-07	2017-09-20	negative	negative	NA	NA	NA	NA	NA	NA	NA	yes	2018-03-27	2018-10-04	completed	negative	NA	NA	2018-11-20	schisto_neg	no	NA	NA	NA	NA
TM-L219	10	M	PK29	pk	2016-12-01	2017-03-17	2017-09-21	negative	negative	NA	NA	NA	NA	NA	NA	NA	yes	2018-03-29	2018-10-03	completed	negative	NA	NA	2018-10-03	schisto_neg	no	NA	NA	NA	NA
TM-L220	11	F	PK33	pk	2016-12-01	2017-03-17	2017-11-03	negative	negative	NA	NA	NA	NA	NA	NA	NA	yes	2018-03-28	2018-10-12	completed	negative	NA	NA	2018-10-12	schisto_neg	no	NA	NA	NA	NA
TM-L221	6	M	PK29	pk	2016-12-01	2017-03-13	2017-06-16	NA	NA	NA	NA	NA	NA	NA	NA	NA	no	NA	NA	withdrawn	NA	NA	NA	2017-06-16	NA	no	NA	NA	NA	NA
TM-L222	12	M	PK27	pk	2016-12-01	2017-03-10	2017-07-24	NA	NA	NA	NA	NA	NA	NA	NA	NA	no	NA	NA	withdrawn	NA	NA	NA	2017-07-24	NA	no	NA	NA	NA	NA
TM-L223	23	F	PK28	pk	2016-12-01	2017-03-10	2017-03-10	NA	NA	NA	NA	NA	NA	NA	NA	NA	no	NA	NA	withdrawn	NA	NA	NA	2017-03-10	NA	no	NA	NA	NA	NA
TM-L224	26	F	PK29	pk	2016-11-16	2017-03-09	2017-04-27	NA	NA	NA	NA	NA	NA	NA	NA	NA	no	NA	NA	withdrawn	NA	NA	NA	2017-04-27	NA	no	NA	NA	NA	NA
TM-L225	20	F	PK26	pk	2016-11-16	2017-03-21	2017-04-21	NA	NA	NA	NA	NA	NA	NA	NA	NA	no	NA	NA	withdrawn	NA	NA	NA	2017-04-21	NA	no	NA	NA	NA	NA
TM-L226	11	F	SIAT	pk	2016-12-05	2017-03-03	2017-09-20	positive	positive	V6	NA	500	heavy	2017-11-10	NA	NA	yes	2018-03-22	2018-11-07	completed	negative	NA	NA	2018-11-07	schisto_pos	no	NA	NA	NA	NA
TM-L227	11	M	PK28	pk	2016-12-01	2017-03-10	2017-09-21	positive	positive	V6	NA	6	light	NA	NA	NA	yes	2018-03-29	NA	withdrawn	NA	NA	NA	2018-06-25	schisto_pos	no	NA	NA	NA	NA
TM-L228	9	M	PK22	pk	2016-11-28	2017-03-09	2017-09-21	negative	negative	NA	NA	NA	NA	NA	NA	NA	yes	2018-03-27	2018-10-03	completed	negative	NA	NA	2018-10-03	schisto_neg	no	NA	NA	NA	NA
TM-L229	7	M	PK22	pk	2016-11-28	2017-03-15	2017-09-21	negative	negative	NA	NA	NA	NA	NA	NA	NA	yes	2018-03-27	2018-10-05	completed	negative	NA	NA	2018-10-05	schisto_neg	no	NA	NA	NA	NA
TM-L230	10	M	PK22	pk	2016-11-28	2017-03-06	2017-09-21	negative	negative	NA	NA	NA	NA	NA	NA	NA	yes	2018-03-27	2018-10-03	completed	negative	NA	NA	2018-10-03	schisto_neg	no	NA	NA	NA	NA
TM-L231	11	M	PK33	pk	2016-12-09	2017-03-17	2017-09-22	negative	negative	NA	NA	NA	NA	NA	NA	NA	yes	2018-03-28	2018-09-28	completed	negative	NA	NA	2018-09-28	schisto_neg	no	NA	NA	NA	NA
TM-L232	15	F	PK33	pk	2016-12-09	2017-03-15	2017-07-24	negative	negative	NA	NA	NA	NA	NA	NA	NA	yes	2018-03-30	2018-10-05	completed	positive	1	light	2018-10-05	schisto_pos	no	NA	NA	NA	NA
TM-L233	8	M	PK29	pk	2016-12-09	2017-03-13	2017-10-24	negative	negative	NA	NA	NA	NA	NA	NA	NA	yes	2018-03-28	2018-11-30	completed	negative	NA	NA	2018-11-30	schisto_neg	no	NA	NA	NA	NA
TM-L234	11	F	PK29	pk	2016-12-09	2017-03-15	2017-10-24	negative	negative	NA	NA	NA	NA	NA	NA	NA	yes	2018-03-28	2018-11-30	completed	negative	NA	NA	2018-11-30	schisto_neg	no	NA	NA	NA	NA
TM-L235	7	M	St_MARTIN	pk	2016-12-08	2017-03-08	2017-06-19	NA	NA	NA	NA	NA	NA	NA	NA	NA	no	NA	NA	withdrawn	NA	NA	NA	2017-06-19	NA	no	NA	NA	NA	NA
TM-L236	13	M	St_MARTIN	pk	2016-12-08	2017-03-08	2017-06-15	NA	NA	NA	NA	NA	NA	NA	NA	NA	no	NA	NA	withdrawn	NA	NA	NA	2017-06-15	NA	no	NA	NA	NA	NA
TM-L237	10	F	PK09	pk	2016-12-08	2017-03-14	2017-10-09	negative	negative	NA	NA	NA	NA	NA	NA	NA	yes	2018-03-23	2018-10-05	completed	negative	NA	NA	2018-10-05	schisto_neg	no	NA	NA	NA	NA
TM-L238	7	F	PK09	pk	2016-12-08	2017-03-14	2017-09-20	negative	negative	NA	NA	NA	NA	NA	NA	NA	yes	2018-03-23	2018-09-27	completed	positive	4	light	2018-10-10	schisto_pos	no	NA	NA	NA	NA
TM-L239	12	M	PK22	pk	2016-12-07	2017-03-06	2017-09-21	positive	positive	V6	NA	8	light	2017-11-09	NA	NA	no	NA	NA	withdrawn	NA	NA	NA	2017-09-21	schisto_pos	no	NA	NA	NA	NA
TM-L240	12	M	PK33	pk	2016-12-09	2017-03-13	2017-06-16	NA	NA	NA	NA	NA	NA	NA	NA	NA	no	NA	NA	withdrawn	NA	NA	NA	2017-06-16	NA	no	NA	NA	NA	NA
TM-L241	17	M	SIAT	pk	2016-11-29	2017-03-22	2017-09-22	negative	negative	NA	NA	NA	NA	NA	NA	NA	no	NA	NA	withdrawn	NA	NA	NA	2017-09-22	schisto_neg	no	NA	NA	NA	NA
TM-L242	8	M	PK10	pk	2016-12-06	2017-03-07	2017-08-21	negative	negative	NA	NA	NA	NA	NA	NA	NA	no	NA	NA	withdrawn	NA	NA	NA	2017-08-21	schisto_neg	no	NA	NA	NA	NA
TM-L243	12	F	PK10	pk	2016-12-06	2017-03-07	2017-10-06	positive	positive	V6	NA	12	light	NA	NA	NA	no	NA	NA	withdrawn	NA	NA	NA	2017-10-06	schisto_pos	no	NA	NA	NA	NA
TM-L244	11	M	PK14	pk	2016-12-23	2017-03-03	2017-06-15	NA	NA	NA	NA	NA	NA	NA	NA	NA	no	NA	NA	withdrawn	NA	NA	NA	2017-06-15	NA	no	NA	NA	NA	NA
TM-L245	7	F	PK21	pk	2016-12-23	2017-03-24	2017-10-06	negative	negative	NA	NA	NA	NA	NA	NA	NA	yes	2018-03-27	2018-10-03	completed	positive	3	light	2018-10-03	schisto_pos	no	NA	NA	NA	NA
TM-L246	9	F	PK21	pk	2016-12-23	2017-03-24	2017-10-25	negative	positive	UV	2017-04-21	500	heavy	2017-04-21	NA	NA	yes	2018-03-27	2018-10-05	completed	negative	NA	NA	2018-10-05	schisto_pos	yes	2017-04-21	500	heavy	phase1
TM-L247	18	F	PK33	pk	2016-12-23	2017-04-20	2017-06-22	NA	NA	NA	NA	NA	NA	NA	NA	NA	no	NA	NA	withdrawn	NA	NA	NA	2017-06-22	NA	no	NA	NA	NA	NA
TM-L248	7	F	PK33	pk	2016-12-23	2017-03-21	2017-10-05	negative	negative	NA	NA	NA	NA	NA	NA	NA	yes	2018-04-09	2018-09-28	completed	negative	NA	NA	2018-09-28	schisto_neg	no	NA	NA	NA	NA
TM-L249	15	M	PK14	pk	2017-01-05	2017-03-07	2017-05-30	NA	NA	NA	NA	NA	NA	NA	NA	NA	no	NA	NA	withdrawn	NA	NA	NA	2017-05-30	NA	no	NA	NA	NA	NA
TM-L250	6	F	PK11	pk	2016-12-30	2017-03-23	2017-10-04	negative	negative	NA	NA	NA	NA	NA	NA	NA	yes	2018-03-29	2018-12-20	completed	positive	2	light	2018-12-20	schisto_neg	no	NA	NA	NA	NA
TM-L251	11	F	SIAT	pk	2017-01-06	2017-03-03	2017-10-10	positive	positive	V6	NA	15	light	NA	NA	NA	yes	2018-03-22	2018-11-07	completed	positive	275	heavy	2018-11-07	schisto_pos	no	NA	NA	NA	NA
TM-L252	9	F	SIAT	pk	2017-01-05	2017-03-08	2017-10-05	negative	positive	UV	2017-03-16	500	heavy	NA	NA	NA	yes	2018-03-22	2018-12-27	completed	positive	4	light	2018-12-27	schisto_pos	yes	2017-04-18	500	heavy	phase1
TM-L253	7	F	SIAT	pk	2017-01-06	2017-03-16	2017-10-26	positive	positive	V6	NA	1	light	NA	NA	NA	no	NA	NA	withdrawn	NA	NA	NA	2017-07-24	schisto_pos	no	NA	NA	NA	NA
TM-L254	15	M	PK14	pk	2017-01-09	2017-03-07	2017-05-24	NA	NA	NA	NA	NA	NA	NA	NA	NA	no	NA	NA	withdrawn	NA	NA	NA	2017-05-24	NA	no	NA	NA	NA	NA
TM-L255	8	M	PK16	pk	2016-12-07	2017-03-16	2017-08-14	negative	negative	NA	NA	NA	NA	NA	NA	NA	no	NA	NA	withdrawn	NA	NA	NA	2017-08-14	schisto_neg	no	NA	NA	NA	NA
TM-L256	12	M	PK33	pk	2016-12-07	2017-03-17	2017-07-24	NA	NA	NA	NA	NA	NA	NA	NA	NA	no	NA	NA	withdrawn	NA	NA	NA	2017-07-24	NA	no	NA	NA	NA	NA
TM-L257	27	M	PK33	pk	2017-01-05	2017-04-12	2017-06-16	NA	NA	NA	NA	NA	NA	NA	NA	NA	no	NA	NA	withdrawn	NA	NA	NA	2017-06-16	NA	no	NA	NA	NA	NA
TM-L258	14	M	SIAT	pk	2017-01-05	2017-03-08	2017-09-20	positive	positive	V6	NA	66	heavy	2017-11-10	NA	NA	yes	2018-03-22	2018-12-20	completed	positive	52	heavy	2018-08-28	schisto_pos	no	NA	NA	NA	NA
TM-L259	13	F	PK11	pk	2016-12-30	2017-03-23	2017-10-04	positive	positive	V6	NA	10	light	2017-11-10	NA	NA	yes	2018-03-29	2018-11-14	completed	negative	NA	NA	2018-11-14	schisto_pos	no	NA	NA	NA	NA
TM-L260	15	F	PK11	pk	2016-12-30	2017-03-23	2017-10-04	negative	negative	NA	NA	NA	NA	NA	NA	NA	yes	2018-03-29	2018-09-25	completed	negative	NA	NA	2018-09-25	schisto_neg	no	NA	NA	NA	NA
TM-L261	17	M	PK18	pk	2016-12-30	2017-03-03	2017-09-20	positive	positive	V6	NA	8	light	NA	NA	NA	no	NA	NA	withdrawn	NA	NA	NA	2017-09-20	schisto_pos	no	NA	NA	NA	NA
TM-L262	9	M	St_MARTIN	pk	2017-01-06	2017-03-14	2017-07-14	NA	NA	NA	NA	NA	NA	NA	NA	NA	no	NA	NA	withdrawn	NA	NA	NA	2017-07-14	NA	no	NA	NA	NA	NA
TM-L263	11	F	PK27	pk	2016-11-16	2017-03-10	2017-10-09	negative	negative	NA	NA	NA	NA	NA	NA	NA	yes	2018-04-10	2018-11-22	completed	negative	NA	NA	2018-11-22	schisto_neg	no	NA	NA	NA	NA
TM-L264	13	F	PK9	pk	2017-01-09	2017-03-22	2017-09-20	negative	negative	NA	NA	NA	NA	NA	NA	NA	no	NA	NA	withdrawn	NA	NA	NA	2017-09-20	schisto_neg	no	NA	NA	NA	NA
TM-L265	25	F	PK33	pk	2017-01-10	2017-04-12	2017-04-12	NA	NA	NA	NA	NA	NA	NA	NA	NA	no	NA	NA	withdrawn	NA	NA	NA	2017-04-12	NA	no	NA	NA	NA	NA
TM-L266	12	M	PK33	pk	2016-12-23	2017-04-12	2017-10-05	negative	negative	NA	NA	NA	NA	NA	NA	NA	yes	2018-04-09	2018-10-01	completed	negative	NA	NA	2018-10-01	schisto_neg	no	NA	NA	NA	NA
TM-L267	14	M	PK33	pk	2016-12-23	2017-04-12	2017-10-05	negative	negative	NA	NA	NA	NA	NA	NA	NA	yes	2018-04-09	2018-10-01	completed	negative	NA	NA	2018-10-01	schisto_neg	no	NA	NA	NA	NA
TM-L268	8	F	PK33	pk	2016-12-23	2017-04-12	2017-10-16	negative	negative	NA	NA	NA	NA	NA	NA	NA	yes	2018-04-09	2018-10-01	completed	negative	NA	NA	2018-10-01	schisto_neg	no	NA	NA	NA	NA
TM-L269	7	M	PK15	pk	2017-01-11	2017-04-04	2017-09-20	positive	positive	V6	NA	14	light	2017-11-10	NA	NA	yes	2018-03-29	2018-09-27	completed	negative	NA	NA	2018-09-27	schisto_pos	no	NA	NA	NA	NA
TM-L270	9	F	PK9	pk	2017-01-09	2017-03-23	2017-04-13	NA	NA	NA	NA	NA	NA	NA	NA	NA	no	NA	NA	withdrawn	NA	NA	NA	2017-04-13	NA	no	NA	NA	NA	NA
TM-L272	12	F	SIAT	pk	2017-01-06	2017-05-31	2017-11-09	positive	positive	V6	NA	1	light	NA	NA	NA	no	NA	NA	withdrawn	NA	NA	NA	2017-11-09	schisto_pos	no	NA	NA	NA	NA
TM-L273	7	M	PK18	pk	2017-04-04	2017-05-30	2017-09-18	NA	NA	NA	NA	NA	NA	NA	NA	NA	no	NA	NA	withdrawn	NA	NA	NA	2017-09-18	NA	no	NA	NA	NA	NA
TM-L274	8	F	BINDO	bindo	2017-04-05	2017-05-19	2017-11-07	negative	negative	NA	NA	NA	NA	NA	NA	NA	yes	2018-02-16	2018-10-31	completed	negative	NA	NA	2018-11-14	schisto_neg	no	NA	NA	NA	NA
TM-L275	10	M	BINDO	bindo	2017-04-06	2017-05-19	2017-11-06	negative	negative	NA	NA	NA	NA	NA	NA	NA	yes	2018-02-19	2018-10-31	completed	negative	NA	NA	2018-10-31	schisto_neg	no	NA	NA	NA	NA
TM-L276	7	M	SIAT	pk	2017-04-04	2017-05-30	2017-10-09	negative	negative	NA	NA	NA	NA	NA	NA	NA	no	NA	NA	withdrawn	NA	NA	NA	2017-10-09	schisto_neg	no	NA	NA	NA	NA
TM-L277	11	F	BINDO	bindo	2017-04-06	2017-05-19	2017-11-06	negative	negative	NA	NA	NA	NA	NA	NA	NA	yes	2018-02-19	2018-09-26	completed	negative	NA	NA	2018-09-26	schisto_neg	no	NA	NA	NA	NA
TM-L279	18	F	BINDO	bindo	2017-04-05	2017-05-18	2017-12-04	negative	negative	NA	NA	NA	NA	NA	NA	NA	yes	2018-03-15	2018-10-10	completed	negative	NA	NA	2018-10-10	schisto_neg	no	NA	NA	NA	NA
TM-L280	21	M	BINDO	bindo	2017-04-06	2017-07-28	2017-12-13	positive	positive	V6	NA	75	heavy	NA	NA	NA	yes	2018-04-23	NA	withdrawn	NA	NA	NA	2018-04-23	schisto_pos	no	NA	NA	NA	NA
TM-L282	12	M	BINDO	bindo	2017-04-05	2017-05-18	2017-11-16	negative	negative	NA	NA	NA	NA	NA	NA	NA	yes	2018-02-19	2018-09-17	completed	negative	NA	NA	2018-09-17	schisto_neg	no	NA	NA	NA	NA
TM-L283	14	M	BINDO	bindo	2017-04-06	2017-06-01	2017-12-18	negative	negative	NA	NA	NA	NA	NA	NA	NA	yes	2018-03-19	2018-10-10	completed	negative	NA	NA	2018-10-10	schisto_neg	no	NA	NA	NA	NA
TM-L284	16	F	BINDO	bindo	2017-04-12	2017-05-17	2017-11-02	negative	negative	NA	NA	NA	NA	NA	NA	NA	yes	2018-02-26	2018-01-04	completed	negative	NA	NA	2018-10-04	schisto_neg	no	NA	NA	NA	NA
TM-L285	22	F	BINDO	bindo	2017-04-12	2017-05-22	2017-11-02	negative	negative	NA	NA	NA	NA	NA	NA	NA	yes	2018-02-28	NA	withdrawn	NA	NA	NA	2018-06-22	schisto_neg	no	NA	NA	NA	NA
TM-L286	13	M	BINDO	bindo	2017-04-12	2017-05-31	2017-11-29	negative	negative	NA	NA	NA	NA	NA	NA	NA	yes	2018-02-26	2018-09-13	completed	negative	NA	NA	2018-09-13	schisto_neg	no	NA	NA	NA	NA
TM-L287	20	F	BINDO	bindo	2017-04-20	2017-05-30	2017-09-12	NA	NA	NA	NA	NA	NA	NA	NA	NA	no	NA	NA	withdrawn	NA	NA	NA	2017-09-12	NA	no	NA	NA	NA	NA
TM-L288	12	F	BINDO	bindo	2017-04-17	2017-05-25	2017-11-30	negative	negative	NA	NA	NA	NA	NA	NA	NA	yes	2018-03-22	2018-09-10	completed	negative	NA	NA	2018-09-10	schisto_neg	no	NA	NA	NA	NA
TM-L289	13	F	BINDO	bindo	2017-04-17	2017-05-23	2017-08-18	NA	NA	NA	NA	NA	NA	NA	NA	NA	no	NA	NA	withdrawn	NA	NA	NA	2017-08-18	NA	no	NA	NA	NA	NA
TM-L290	12	M	BINDO	bindo	2017-04-17	2017-05-23	2017-11-02	negative	negative	NA	NA	NA	NA	NA	NA	NA	yes	2018-02-26	2018-09-04	completed	negative	NA	NA	2018-09-04	schisto_neg	no	NA	NA	NA	NA
TM-L291	7	M	BINDO	bindo	2017-04-17	2017-05-23	2017-11-21	negative	negative	NA	NA	NA	NA	NA	NA	NA	yes	2018-02-28	2018-09-04	completed	negative	NA	NA	2018-09-04	schisto_neg	no	NA	NA	NA	NA
TM-L292	11	F	BINDO	bindo	2017-04-17	2017-05-23	2017-12-11	negative	negative	NA	NA	NA	NA	NA	NA	NA	yes	2018-03-15	2018-08-23	completed	negative	NA	NA	2018-08-23	schisto_neg	no	NA	NA	NA	NA
TM-L293	8	F	BINDO	bindo	2017-04-17	2017-05-19	2017-09-08	NA	NA	NA	NA	NA	NA	NA	NA	NA	no	NA	NA	withdrawn	NA	NA	NA	2017-09-08	NA	no	NA	NA	NA	NA
TM-L294	14	F	BINDO	bindo	2017-04-21	2017-05-17	2017-11-21	negative	negative	NA	NA	NA	NA	NA	NA	NA	yes	2018-02-16	2018-09-14	completed	negative	NA	NA	2018-09-14	schisto_neg	no	NA	NA	NA	NA
TM-L295	17	F	BINDO	bindo	2017-04-21	2017-05-17	2017-05-17	NA	NA	NA	NA	NA	NA	NA	NA	NA	no	NA	NA	withdrawn	NA	NA	NA	2017-05-17	NA	no	NA	NA	NA	NA
TM-L296	12	F	BINDO	bindo	2017-04-25	2017-05-22	2017-11-02	negative	negative	NA	NA	NA	NA	NA	NA	NA	yes	2018-02-26	2018-10-04	completed	negative	NA	NA	2018-10-04	schisto_neg	no	NA	NA	NA	NA
TM-L297	26	M	BINDO	bindo	2017-04-21	2017-05-30	2017-09-19	NA	NA	NA	NA	NA	NA	NA	NA	NA	no	NA	NA	withdrawn	NA	NA	NA	2017-09-19	NA	no	NA	NA	NA	NA
TM-L298	12	F	BINDO	bindo	2017-04-24	2017-05-22	2017-12-27	negative	negative	NA	NA	NA	NA	NA	NA	NA	yes	2018-03-28	2018-10-17	completed	negative	NA	NA	2018-10-17	schisto_neg	no	NA	NA	NA	NA
TM-L300	26	F	BINDO	bindo	2017-04-27	2017-05-25	2017-12-04	negative	negative	NA	NA	NA	NA	NA	NA	NA	yes	2018-03-09	2018-09-21	completed	negative	NA	NA	2018-09-21	schisto_neg	no	NA	NA	NA	NA
TM-L301	21	F	BINDO	bindo	2017-05-03	2017-05-17	2017-11-03	negative	negative	NA	NA	NA	NA	NA	NA	NA	no	NA	NA	withdrawn	NA	NA	NA	2017-11-03	schisto_neg	no	NA	NA	NA	NA
TM-L302	13	F	BINDO	bindo	2017-04-26	2017-05-17	2017-09-15	NA	NA	NA	NA	NA	NA	NA	NA	NA	no	NA	NA	withdrawn	NA	NA	NA	2017-09-15	NA	no	NA	NA	NA	NA
TM-L304	9	F	BINDO	bindo	2017-04-25	2017-05-17	2017-12-11	negative	negative	NA	NA	NA	NA	NA	NA	NA	yes	2018-03-13	2018-09-13	completed	negative	NA	NA	2018-09-13	schisto_neg	no	NA	NA	NA	NA
TM-L305	7	M	BINDO	bindo	2017-04-25	2017-05-29	2017-11-02	negative	negative	NA	NA	NA	NA	NA	NA	NA	yes	2018-02-26	2018-09-13	completed	negative	NA	NA	2018-09-13	schisto_neg	no	NA	NA	NA	NA
TM-L306	17	M	BINDO	bindo	2017-04-25	2017-05-18	2018-01-03	negative	negative	NA	NA	NA	NA	NA	NA	NA	yes	2018-04-13	NA	withdrawn	NA	NA	NA	2018-05-16	schisto_neg	no	NA	NA	NA	NA
TM-L307	23	M	BINDO	bindo	2017-04-24	2017-05-19	2017-11-23	negative	negative	NA	NA	NA	NA	NA	NA	NA	yes	2018-04-12	NA	withdrawn	NA	NA	NA	2018-08-22	schisto_neg	no	NA	NA	NA	NA
TM-L308	12	F	BINDO	bindo	2017-05-04	2017-05-30	2017-11-23	positive	positive	V6	NA	37	light	NA	NA	NA	no	NA	NA	withdrawn	NA	NA	NA	2017-11-23	schisto_pos	no	NA	NA	NA	NA
TM-L309	8	F	BINDO	bindo	2017-04-24	2017-05-30	2017-11-16	negative	negative	NA	NA	NA	NA	NA	NA	NA	yes	2018-02-28	2018-09-26	completed	negative	NA	NA	2018-09-26	schisto_neg	no	NA	NA	NA	NA
TM-L310	11	M	BINDO	bindo	2017-04-20	2017-05-22	2017-11-16	negative	negative	NA	NA	NA	NA	NA	NA	NA	yes	2018-02-28	2018-10-04	completed	negative	NA	NA	2018-10-04	schisto_neg	no	NA	NA	NA	NA
TM-L311	10	M	BINDO	bindo	2017-04-21	2017-05-24	2017-11-16	negative	negative	NA	NA	NA	NA	NA	NA	NA	yes	2018-03-02	2018-10-08	completed	negative	NA	NA	2018-10-08	schisto_neg	no	NA	NA	NA	NA
TM-L312	7	F	BINDO	bindo	2017-04-20	2017-05-24	2017-11-02	negative	negative	NA	NA	NA	NA	NA	NA	NA	yes	2018-02-16	2018-09-04	completed	negative	NA	NA	2018-09-04	schisto_neg	no	NA	NA	NA	NA
TM-L313	6	F	BINDO	bindo	2017-04-20	2017-05-24	2017-11-02	negative	negative	NA	NA	NA	NA	NA	NA	NA	yes	2018-02-16	2018-09-04	completed	negative	NA	NA	2018-09-04	schisto_neg	no	NA	NA	NA	NA
TM-L314	17	F	BINDO	bindo	2017-04-21	2017-05-25	2017-12-28	negative	negative	NA	NA	NA	NA	NA	NA	NA	yes	2018-03-28	2018-11-22	completed	positive	1	light	2018-11-22	schisto_pos	no	NA	NA	NA	NA
TM-L315	23	F	BINDO	bindo	2017-04-21	2017-05-22	2017-08-22	NA	NA	NA	NA	NA	NA	NA	NA	NA	no	NA	NA	withdrawn	NA	NA	NA	2017-08-22	NA	no	NA	NA	NA	NA
TM-L316	8	M	BINDO	bindo	2017-04-20	2017-05-22	2017-05-22	NA	NA	NA	NA	NA	NA	NA	NA	NA	no	NA	NA	withdrawn	NA	NA	NA	2017-05-22	NA	no	NA	NA	NA	NA
TM-L317	9	F	BINDO	bindo	2017-04-21	2017-05-19	2017-05-19	NA	NA	NA	NA	NA	NA	NA	NA	NA	no	NA	NA	withdrawn	NA	NA	NA	2017-05-19	NA	no	NA	NA	NA	NA
TM-L318	7	F	BINDO	bindo	2017-05-18	2017-06-19	2017-12-15	negative	negative	NA	NA	NA	NA	NA	NA	NA	yes	2018-03-13	2018-10-04	completed	negative	NA	NA	2018-11-28	schisto_neg	no	NA	NA	NA	NA
TM-L319	16	F	BINDO	bindo	2017-05-18	2017-07-03	2017-12-22	negative	negative	NA	NA	NA	NA	NA	NA	NA	yes	2018-03-28	2018-09-13	completed	negative	NA	NA	2018-09-13	schisto_neg	no	NA	NA	NA	NA
TM-L320	18	F	BINDO	bindo	2017-05-18	2017-06-30	2017-11-30	negative	negative	NA	NA	NA	NA	NA	NA	NA	yes	2018-03-28	2018-10-07	completed	negative	NA	NA	2018-11-07	schisto_neg	no	NA	NA	NA	NA
TM-L321	19	F	BINDO	bindo	2017-05-17	2017-05-29	2017-11-10	negative	negative	NA	NA	NA	NA	NA	NA	NA	yes	2018-02-19	2018-11-22	completed	negative	NA	NA	2018-11-22	schisto_neg	no	NA	NA	NA	NA
TM-L323	11	M	BINDO	bindo	2017-05-24	2017-06-13	2017-12-01	negative	negative	NA	NA	NA	NA	NA	NA	NA	yes	2018-03-13	2018-11-07	completed	negative	NA	NA	2018-11-07	schisto_neg	no	NA	NA	NA	NA
TM-L324	10	M	BINDO	bindo	2017-05-24	2017-06-13	2017-12-01	negative	negative	NA	NA	NA	NA	NA	NA	NA	yes	2018-03-06	2018-11-07	completed	negative	NA	NA	2018-11-07	schisto_neg	no	NA	NA	NA	NA
TM-L325	9	M	BINDO	bindo	2017-05-24	2017-06-13	2017-12-01	negative	negative	NA	NA	NA	NA	NA	NA	NA	yes	2018-03-06	2018-11-07	completed	negative	NA	NA	2018-11-07	schisto_neg	no	NA	NA	NA	NA
TM-L326	6	F	BINDO	bindo	2017-05-24	2017-06-13	2017-11-03	negative	negative	NA	NA	NA	NA	NA	NA	NA	yes	2018-02-28	2018-11-07	completed	negative	NA	NA	2018-11-07	schisto_neg	no	NA	NA	NA	NA
TM-L327	16	M	BINDO	bindo	2017-05-24	2017-06-13	2017-12-07	positive	positive	V6	NA	25	light	NA	NA	NA	no	NA	NA	withdrawn	NA	NA	NA	2017-12-07	schisto_pos	no	NA	NA	NA	NA
TM-L328	8	F	BINDO	bindo	2017-05-04	2017-06-30	2018-01-08	positive	positive	V6	NA	476	heavy	NA	NA	NA	yes	2018-03-14	2018-10-23	completed	negative	NA	NA	2018-10-23	schisto_pos	no	NA	NA	NA	NA
TM-L330	17	M	BINDO	bindo	2017-06-02	2017-06-19	2017-06-19	NA	NA	NA	NA	NA	NA	NA	NA	NA	no	NA	NA	withdrawn	NA	NA	NA	2017-06-19	NA	no	NA	NA	NA	NA
TM-L331	15	F	BINDO	bindo	2017-06-06	2017-07-03	2017-07-03	NA	NA	NA	NA	NA	NA	NA	NA	NA	no	NA	NA	withdrawn	NA	NA	NA	2017-07-03	NA	no	NA	NA	NA	NA
TM-L333	14	F	BINDO	bindo	2017-05-02	2017-06-19	2017-12-07	negative	negative	NA	NA	NA	NA	NA	NA	NA	yes	2018-03-09	2018-09-04	completed	negative	NA	NA	2018-09-04	schisto_neg	no	NA	NA	NA	NA
TM-L334	20	F	BINDO	bindo	2017-05-25	2017-07-04	2017-12-27	positive	positive	V6	NA	130	heavy	NA	NA	NA	yes	2018-07-19	2018-11-30	completed	negative	NA	NA	2018-11-30	schisto_pos	no	NA	NA	NA	NA
TM-L335	10	F	BINDO	bindo	2017-05-30	2017-06-30	2017-12-18	positive	positive	V6	NA	344	heavy	NA	NA	NA	no	NA	NA	withdrawn	NA	NA	NA	2017-12-18	schisto_pos	no	NA	NA	NA	NA
TM-L336	18	M	BINDO	bindo	2017-06-07	2017-07-03	2018-01-10	NA	NA	NA	NA	NA	NA	NA	NA	NA	no	NA	NA	withdrawn	NA	NA	NA	2018-01-10	NA	no	NA	NA	NA	NA
TM-L337	13	M	BINDO	bindo	2017-06-12	2017-07-04	2017-12-22	negative	negative	NA	NA	NA	NA	NA	NA	NA	yes	2018-03-28	2018-10-16	completed	negative	NA	NA	2018-10-16	schisto_neg	no	NA	NA	NA	NA
TM-L338	12	M	BINDO	bindo	2017-06-12	2017-07-04	2017-12-20	negative	negative	NA	NA	NA	NA	NA	NA	NA	yes	2018-03-13	2018-09-26	completed	negative	NA	NA	2018-09-26	schisto_neg	no	NA	NA	NA	NA
TM-L339	25	M	BINDO	bindo	2017-06-09	2017-07-06	2017-12-22	negative	negative	NA	NA	NA	NA	NA	NA	NA	yes	2018-03-30	NA	withdrawn	NA	NA	NA	2018-07-11	schisto_neg	no	NA	NA	NA	NA
TM-L340	25	M	BINDO	bindo	2017-07-05	2017-07-28	2017-09-08	NA	NA	NA	NA	NA	NA	NA	NA	NA	no	NA	NA	withdrawn	NA	NA	NA	2017-09-08	NA	no	NA	NA	NA	NA
TM-L341	19	F	BINDO	bindo	2017-07-05	2017-07-11	2018-01-09	NA	NA	NA	NA	NA	NA	NA	NA	NA	no	NA	NA	withdrawn	NA	NA	NA	2018-01-09	NA	no	NA	NA	NA	NA
TM-L342	13	M	BINDO	bindo	2017-06-30	2017-07-12	2018-01-22	negative	negative	NA	NA	NA	NA	NA	NA	NA	yes	2018-03-12	NA	withdrawn	NA	NA	NA	2018-03-12	schisto_neg	no	NA	NA	NA	NA
TM-L343	24	M	BINDO	bindo	2017-07-03	2017-07-11	2017-11-22	NA	NA	NA	NA	NA	NA	NA	NA	NA	yes	2018-04-10	NA	withdrawn	NA	NA	NA	2018-04-10	NA	no	NA	NA	NA	NA
TM-L344	17	F	BINDO	bindo	2017-07-03	2017-08-07	2018-01-16	negative	negative	NA	NA	NA	NA	NA	NA	NA	yes	2018-03-30	2018-09-04	completed	negative	NA	NA	2018-09-04	schisto_neg	no	NA	NA	NA	NA
TM-L345	27	M	BINDO	bindo	2017-07-03	2017-07-25	2017-08-22	NA	NA	NA	NA	NA	NA	NA	NA	NA	no	NA	NA	withdrawn	NA	NA	NA	2017-08-22	NA	no	NA	NA	NA	NA
TM-L346	24	F	BINDO	bindo	2017-07-03	2017-07-25	2017-07-25	NA	NA	NA	NA	NA	NA	NA	NA	NA	no	NA	NA	withdrawn	NA	NA	NA	2017-07-25	NA	no	NA	NA	NA	NA
TM-L348	7	F	BINDO	bindo	2017-06-30	2017-07-12	2018-01-18	negative	negative	NA	NA	NA	NA	NA	NA	NA	yes	2018-03-12	NA	withdrawn	NA	NA	NA	2018-03-12	schisto_neg	no	NA	NA	NA	NA
TM-L349	15	M	BINDO	bindo	2017-06-30	2017-08-10	2017-12-20	negative	negative	NA	NA	NA	NA	NA	NA	NA	no	NA	NA	withdrawn	NA	NA	NA	2017-12-20	schisto_neg	no	NA	NA	NA	NA
TM-L350	10	M	BINDO	bindo	2017-06-30	2017-07-12	2018-01-10	negative	negative	NA	NA	NA	NA	NA	NA	NA	yes	2018-05-24	2018-09-21	completed	negative	NA	NA	2018-09-21	schisto_neg	no	NA	NA	NA	NA
TM-L351	19	M	BINDO	bindo	2017-05-25	2017-07-11	2018-02-09	negative	negative	NA	NA	NA	NA	NA	NA	NA	yes	2018-03-12	NA	withdrawn	NA	NA	NA	2018-03-12	schisto_neg	no	NA	NA	NA	NA

## Sheet: Table S3
Additional file 1: Table S3. Database used for drug efficacy assessment
ID	age	sex	weight	location	date_event	first_event_occured_at	eggs_count	MacroHaematuria	intensity	dose_PZQ_tablet	treatment1_date	Control1_date	Control1_eggs_count	status_control1	treatment2_date	Control2_date	Control2_eggs_count	status_control2	treatment3_date	Control3_date	Control3_eggs_count	status_control3	IncludForPZQEfficacy	date_P6	statut_P6	eggs_count_result_p6
TM-L007	6	F	24	PK18	2018-02-08	p6	2	no	light	2.5	2018-04-03	2018-05-14	0	neg	2018-05-10	NA	NA	NA	NA	NA	0	neg	yes	2018-01-30	positive_p6	2
TM-L015	9	M	24	PK14	2017-02-16	v6	33	no	light	2.5	2017-04-20	2017-05-28	0	neg	2017-05-19	NA	NA	NA	2017-06-14	2017-06-30	0	neg	yes	NA	NA	NA
TM-L016	6	M	26	PK14	2016-11-22	v6	5	no	light	2.5	2017-04-13	NA	0	neg	2017-05-19	NA	NA	NA	2017-06-14	2017-06-30	0	neg	yes	NA	NA	NA
TM-L017	10	F	35	PK18	2016-11-18	v6	7	no	light	3.5	2017-04-03	2017-05-05	0	neg	2017-05-18	NA	NA	NA	2017-06-14	2017-06-29	0	neg	yes	2018-01-30	negative_p6	NA
TM-L018	10	F	38	PK18	2018-02-08	p6	2	no	light	4	2018-04-03	2018-05-14	0	neg	2018-05-10	NA	NA	NA	NA	NA	0	neg	yes	2018-01-30	positive_p6	2
TM-L020	12	M	29	PK28	2016-11-30	v6	7	no	light	3	2017-04-25	NA	NA	NA	2017-05-22	NA	NA	NA	2017-06-27	NA	NA	NA	no	2018-02-12	negative_p6	NA
TM-L021	12	F	33	PK18	2016-11-23	v6	8	no	light	3.5	2017-04-03	NA	NA	NA	2017-05-19	NA	NA	NA	2017-06-29	NA	NA	NA	no	2018-02-09	negative_p6	NA
TM-L022	12	M	34	PK18	2016-11-18	v6	4	no	light	3.5	2017-04-18	NA	NA	NA	2017-05-22	2017-06-29	0	neg	2017-06-29	NA	0	neg	yes	NA	NA	NA
TM-L024	9	F	24	PK14	2017-02-16	v6	419	no	heavy	2.5	2017-04-24	NA	NA	NA	2017-05-22	NA	NA	NA	2017-06-27	NA	NA	NA	no	NA	NA	NA
TM-L025	11	M	36	PK14	2017-02-20	v6	15	no	light	3.5	2017-04-03	2017-05-05	2	pos	2017-05-19	NA	NA	NA	2017-06-14	2017-07-11	0	neg	yes	2018-01-31	positive_p6	3
TM-L027	12	F	35	PK15	2016-12-27	v6	27	no	light	3.5	2017-04-03	2017-05-09	3	pos	2017-05-17	NA	NA	NA	2017-06-14	2017-07-11	0	neg	yes	2018-01-23	positive_p6	6
TM-L032	10	M	37	PK15	2016-11-18	v6	61	no	heavy	3.5	2017-03-31	2017-05-09	3	pos	2017-05-17	NA	NA	NA	2017-06-14	2017-07-12	4	pos	yes	2018-01-23	negative_p6	NA
TM-L036	11	F	32	PK27	2016-12-30	v6	4	no	light	3.25	NA	NA	NA	NA	NA	NA	NA	NA	NA	NA	NA	NA	no	NA	NA	NA
TM-L039	10	M	29	PK20	2016-11-16	v6	6	no	light	3	2017-04-04	2017-05-04	0	neg	2017-05-18	NA	NA	NA	2017-06-15	NA	0	neg	yes	2018-02-01	negative_p6	NA
TM-L054	10	F	20	PK10	2016-11-25	v6	71	no	heavy	2	2017-03-31	2017-05-05	0	neg	2017-05-22	NA	NA	NA	2017-06-14	NA	0	neg	yes	2018-02-13	negative_p6	NA
TM-L056	8	F	47	PK14	2016-11-21	v6	21	no	light	4	2017-05-02	NA	NA	NA	2017-05-22	NA	NA	NA	2017-06-27	NA	NA	NA	no	2018-01-29	negative_p6	NA
TM-L059	9	M	33	PK22	2016-12-09	v6	3	no	light	3.5	2017-05-02	NA	NA	NA	2017-05-22	NA	NA	NA	2017-06-27	NA	NA	NA	no	2018-01-25	negative_p6	NA
TM-L061	11	M	25	PK16	2018-02-13	p6	3	no	light	2.5	2018-06-25	NA	0	neg	2018-07-26	NA	NA	neg	2018-08-28	2018-09-23	0	neg	yes	2018-02-13	positive_p6	3
TM-L063	11	F	27	PK18	2016-09-27	uv	19	yes	heavy	2.5	2016-10-03	NA	NA	NA	2016-11-04	NA	NA	NA	2016-12-05	2016-12-23	0	neg	yes	2018-01-30	negative_p6	NA
TM-L064	6	F	26	PK20	2016-11-18	v6	3	no	light	2.5	2017-03-30	2017-05-04	0	neg	2017-05-18	NA	NA	NA	2017-06-14	2017-06-28	0	neg	yes	2018-01-30	negative_p6	NA
TM-L065	16	M	24	SIAT	2018-01-30	p6	5	no	light	2.5	2018-04-03	2018-05-14	0	neg	2018-06-25	NA	NA	NA	2018-07-28	NA	0	neg	yes	2018-01-30	positive_p6	5
TM-L066	10	M	24	SIAT	2018-02-20	p6	10	no	light	2.5	2018-04-03	2018-05-14	0	neg	2018-06-25	NA	NA	NA	2018-07-28	NA	0	neg	yes	2018-01-30	positive_p6	10
TM-L067	15	M	25	SIAT	2016-12-16	v6	1	no	light	2.5	2017-04-03	2017-05-05	0	neg	2017-05-18	NA	NA	NA	2017-06-19	2017-07-25	0	neg	yes	2018-02-07	negative_p6	NA
TM-L071	10	F	23.5	PK10	2016-08-12	uv	33	yes	heavy	2.5	2016-08-23	NA	0	neg	2016-09-22	NA	NA	NA	2016-10-24	2016-11-16	0	neg	yes	2018-01-31	positive_p6	3
TM-L073	19	F	26	SIAT	2017-03-28	v6	300	no	heavy	2.5	2017-04-20	NA	NA	NA	2017-05-23	NA	NA	NA	2017-06-27	2017-07-11	0	neg	yes	2018-02-21	positive_p6	4
TM-L074	10	M	29	SIAT	2016-11-18	v6	60	no	heavy	3	2017-04-03	2017-05-05	0	neg	2017-05-19	NA	NA	NA	2017-06-14	2017-07-12	0	neg	yes	2018-01-23	positive_p6	5
TM-L075	8	F	23	PK14	2016-08-11	uv	500	yes	heavy	2.5	2016-08-23	NA	NA	NA	2016-09-22	NA	NA	NA	2016-10-24	NA	NA	NA	no	2018-01-23	negative_p6	NA
TM-L076	22	F	38	PK12	2017-01-27	v6	3	no	light	4	2016-09-19	NA	NA	NA	2016-10-16	NA	NA	NA	2016-11-17	NA	NA	NA	no	NA	NA	NA
TM-L078	8	F	45	PK15	2018-02-07	p6	7	no	light	4.5	2018-04-11	2018-05-15	0	neg	NA	NA	NA	NA	NA	NA	0	neg	yes	2018-02-07	positive_p6	7
TM-L079	14	F	20	St_MARTIN	2016-11-30	v6	2	no	light	2	2017-03-30	2017-05-03	0	neg	2017-05-18	NA	NA	NA	2017-06-15	NA	0	neg	yes	2018-02-13	negative_p6	NA
TM-L082	9	M	21	PK22	2016-08-04	uv	10	yes	heavy	1.5	2016-08-04	2016-08-26	1	pos	2016-09-07	NA	NA	NA	2016-10-05	2016-11-17	0	neg	yes	2018-02-15	negative_p6	NA
TM-L083	14	F	31	PK22	2016-11-17	v6	2	no	light	2	2017-03-30	2017-05-03	0	neg	2017-05-18	NA	NA	NA	2017-06-15	NA	0	neg	yes	2018-02-14	negative_p6	NA
TM-L085	14	M	47	pk14	2016-11-16	v6	500	no	heavy	4.5	2017-03-30	2017-05-03	210	pos	2017-05-17	NA	NA	NA	2017-06-15	2017-06-28	95	pos	yes	2018-03-19	positive_p6	6
TM-L086	15	M	46	PK15	2016-12-27	v6	136	no	heavy	4.5	2017-05-23	NA	NA	NA	2017-06-29	NA	NA	NA	2017-07-31	NA	NA	NA	no	NA	NA	NA
TM-L087	12	M	32	PK15	2017-02-03	v6	55	no	heavy	3.25	2017-03-30	NA	NA	NA	2017-05-19	NA	NA	NA	2017-06-20	NA	NA	NA	no	NA	NA	NA
TM-L088	19	M	54	PK15	2016-11-23	v6	73	no	heavy	4.5	2017-04-18	NA	NA	NA	2017-05-22	NA	NA	NA	NA	NA	NA	NA	no	NA	NA	NA
TM-L089	11	M	39	PK16	2016-05-23	uv	108	yes	heavy	2.5	2016-05-26	NA	NA	NA	2016-07-14	NA	NA	NA	2016-08-14	2016-09-19	0	neg	yes	2018-03-19	positive_p6	16
TM-L090	10	F	40	PK21	2017-02-01	v6	18	no	light	4	2017-04-04	2017-05-05	0	neg	2017-05-18	NA	NA	NA	2017-06-15	NA	0	neg	yes	2018-02-14	negative_p6	NA
TM-L091	8	F	23	PK21	2016-11-17	v6	20	no	light	2	2017-03-30	2017-05-03	0	neg	2017-05-18	NA	NA	NA	2017-06-15	NA	0	neg	yes	2018-02-14	negative_p6	NA
TM-L093	13	M	40	PK16	2016-05-24	uv	20	yes	heavy	3	2016-05-26	NA	NA	NA	2016-07-14	NA	NA	NA	2016-08-14	2016-09-19	1	pos	yes	2018-03-29	negative_p6	NA
TM-L094	14	M	55	PK18	2016-12-13	v6	8	no	light	4	2017-04-03	2017-05-09	0	neg	2017-05-18	NA	NA	NA	2017-06-15	NA	0	neg	yes	2018-02-13	negative_p6	NA
TM-L095	8	M	25	PK18	2016-12-09	v6	5	no	light	2.5	2017-03-30	2017-05-03	0	neg	2017-05-18	NA	NA	NA	2017-06-14	2017-06-28	0	neg	yes	2018-01-30	negative_p6	NA
TM-L096	10	M	29	PK18	2016-11-18	v6	49	no	light	3	2017-03-30	2017-05-03	0	neg	2017-05-18	NA	NA	NA	2017-06-14	2017-06-28	0	neg	yes	2018-01-30	negative_p6	NA
TM-L100	6	F	16	PK20	2016-08-25	uv	500	yes	heavy	1.5	2016-09-09	NA	NA	NA	2016-10-07	NA	NA	NA	NA	2016-11-17	3	pos	yes	2018-02-20	positive_p6	267
TM-L102	12	F	40	PK18	2016-11-18	v6	11	no	light	4	2017-04-03	2017-05-09	0	neg	2017-05-18	NA	NA	NA	2017-06-15	2017-06-28	0	neg	yes	2018-02-09	negative_p6	NA
TM-L103	9	F	21	PK18	2016-12-09	v6	9	no	light	2	2017-04-18	2017-05-09	0	neg	2017-05-22	NA	NA	NA	2017-06-27	2017-07-25	0	neg	yes	NA	NA	NA
TM-L110	10	M	29	PK33	2017-05-24	v6	7	no	light	3	2017-04-25	NA	NA	NA	2017-05-22	NA	NA	NA	2017-06-27	NA	NA	NA	no	NA	NA	NA
TM-L130	14	M	42	PK20	2017-03-01	v6	14	no	light	4	2017-04-04	2017-05-05	0	neg	2017-05-22	NA	NA	NA	2017-06-15	NA	0	neg	yes	2018-02-07	negative_p6	NA
TM-L134	9	M	29	PK10	2016-12-26	v6	182	no	heavy	2.5	2017-04-03	2017-05-05	0	neg	2017-05-18	NA	NA	NA	2017-06-19	2017-07-11	0	neg	yes	2018-01-26	negative_p6	NA
TM-L136	16	M	53	SIAT	2016-08-05	uv	13	yes	heavy	4	2016-08-23	NA	NA	NA	2016-09-22	NA	NA	NA	2016-10-22	2016-11-22	232	pos	yes	2018-01-26	positive_p6	2
TM-L137	10	M	33	SIAT	2016-08-23	uv	500	yes	heavy	3	2016-09-13	NA	NA	NA	2016-10-24	NA	NA	NA	2016-11-24	2017-12-26	28	pos	yes	2018-02-21	positive_p6	5
TM-L138	13	M	39	SIAT	2017-02-10	v6	46	no	light	3.5	2017-03-31	2017-05-09	2	pos	2017-05-17	NA	NA	NA	2017-06-15	2017-07-11	2	pos	yes	2018-02-21	positive_p6	2
TM-L142	7	M	22	PK15	2016-11-16	v6	213	no	heavy	2	2017-04-03	2017-05-05	4	pos	2017-05-17	NA	NA	NA	2017-06-14	2017-06-29	4	pos	yes	2018-01-23	positive_p6	99
TM-L144	13	M	33	PK21	2016-11-17	v6	3	no	light	3	2017-04-04	NA	NA	NA	2017-05-22	NA	NA	NA	2017-06-27	NA	NA	NA	no	2018-02-13	negative_p6	NA
TM-L145	18	M	53	SIAT	2016-11-22	v6	4	no	light	4	2017-03-31	2017-05-03	0	neg	2017-05-19	NA	NA	NA	2017-06-14	2017-06-30	0	neg	yes	2018-02-02	negative_p6	NA
TM-L146	13	F	41	PK18	2016-11-25	v6	318	no	heavy	4.25	2017-03-30	2017-05-08	2	pos	2017-05-18	NA	NA	NA	2017-06-14	2017-06-28	0	neg	yes	2018-02-09	negative_p6	NA
TM-L147	15	M	44	SIAT	2016-06-29	uv	500	yes	heavy	4.5	2016-06-29	NA	NA	pos	2016-07-29	2016-08-19	1	pos	2016-08-29	NA	NA	neg	yes	2018-02-21	negative_p6	NA
TM-L148	8	F	26	SIAT	2016-08-11	uv	500	yes	heavy	2.5	2016-08-26	NA	NA	NA	2016-09-21	NA	NA	NA	2016-10-25	2016-11-22	0	neg	yes	2018-01-26	negative_p6	NA
TM-L149	15	M	50	SIAT	2016-08-11	uv	265	yes	heavy	3.5	2016-08-23	NA	NA	NA	2016-09-22	NA	NA	NA	2016-10-26	NA	0	neg	yes	2018-03-09	negative_p6	NA
TM-L151	19	F	58	SIAT	2016-07-01	uv	29	yes	heavy	4	2016-07-01	NA	NA	NA	2016-08-01	2016-08-12	0	neg	2016-09-29	NA	0	neg	yes	2018-02-19	negative_p6	NA
TM-L152	19	F	52	PK10	2016-11-23	v6	101	no	heavy	4.5	2017-04-24	2017-05-09	0	neg	2017-05-18	NA	NA	NA	2017-06-15	2017-06-30	0	neg	yes	2018-02-02	negative_p6	NA
TM-L153	10	M	30	SIAT	2016-07-07	uv	26	yes	heavy	2.5	2016-07-29	2016-08-30	14	pos	2016-08-29	NA	NA	NA	2016-09-27	NA	NA	NA	yes	2018-02-09	positive_p6	2
TM-L156	12	M	31	SIAT	2016-11-23	v6	26	no	light	3	2017-04-06	2017-05-09	0	neg	2017-05-22	NA	NA	NA	2017-06-27	NA	0	neg	yes	2018-02-08	positive_p6	12
TM-L157	9	M	23	SIAT	2016-12-28	v6	11	no	light	2.5	2017-03-31	2017-05-18	47	pos	2017-05-18	NA	NA	NA	2017-06-18	NA	NA	NA	yes	2018-02-08	positive_p6	1
TM-L158	15	F	45	SIAT	2016-11-22	v6	8	no	light	3.5	2017-03-31	2017-05-09	0	neg	2017-05-22	NA	NA	NA	2017-06-27	2017-07-13	0	neg	yes	2018-02-06	negative_p6	NA
TM-L159	15	F	44	SIAT	2017-02-14	v6	33	no	light	4.5	2017-03-30	NA	NA	NA	2017-04-20	NA	NA	NA	2017-05-30	NA	NA	NA	no	2018-02-08	negative_p6	NA
TM-L164	13	M	30	SIAT	2016-11-22	v6	59	no	heavy	3	2017-03-31	2017-05-09	6	pos	2017-05-17	NA	NA	NA	2017-06-14	2017-06-28	1	pos	yes	2018-02-12	negative_p6	NA
TM-L165	11	M	30	SIAT	2017-01-06	v6	18	no	light	3	2017-05-22	NA	NA	NA	2017-06-22	NA	NA	NA	2017-07-24	NA	NA	NA	no	2018-02-08	negative_p6	NA
TM-L166	18	M	70	SIAT	2016-09-08	uv	37	yes	heavy	6.5	2016-09-20	NA	NA	NA	2016-10-21	2016-11-22	0	neg	2016-11-21	NA	0	neg	yes	2018-03-23	negative_p6	NA
TM-L169	22	F	55	PK12	2016-09-08	uv	5	yes	heavy	5.5	2016-09-21	NA	NA	NA	2016-10-21	NA	NA	NA	2016-11-22	NA	NA	NA	no	2018-02-02	negative_p6	NA
TM-L170	8	F	24	PK15	2016-10-11	uv	500	yes	heavy	2.5	2016-09-02	NA	NA	NA	2016-10-03	NA	NA	NA	2016-11-03	2016-11-16	0	neg	yes	2018-01-23	positive_p6	37
TM-L171	15	M	48	SIAT	2016-11-22	v6	288	no	heavy	4.5	2017-03-31	2017-05-09	12	pos	2017-05-17	NA	NA	NA	2017-06-14	2017-07-11	0	neg	yes	2018-02-02	negative_p6	NA
TM-L174	14	F	46	St_MARTIN	2016-08-30	uv	211	yes	heavy	3	2016-09-13	2016-10-14	0	neg	2016-10-13	NA	NA	NA	2016-11-14	NA	0	neg	yes	2018-01-26	negative_p6	NA
TM-L175	13	M	40	St_MARTIN	2016-12-22	v6	52	no	heavy	4	2017-04-03	2017-05-09	0	neg	2017-05-18	NA	NA	NA	2017-06-19	NA	0	neg	yes	NA	NA	NA
TM-L179	12	M	45	St_MARTIN	2018-02-21	p6	3	no	light	4.5	2018-04-03	2018-05-14	0	neg	NA	NA	NA	NA	NA	NA	0	neg	yes	2018-02-21	positive_p6	3
TM-L181	7	F	23	St_MARTIN	2016-09-23	uv	4	yes	heavy	1.75	2016-10-05	NA	NA	NA	NA	NA	NA	NA	NA	NA	NA	NA	no	NA	NA	NA
TM-L183	10	F	30	St_MARTIN	2016-09-27	uv	80	yes	heavy	2	2016-03-04	NA	NA	NA	2016-04-04	NA	NA	NA	2016-05-04	NA	NA	neg	yes	2018-02-06	negative_p6	NA
TM-L184	15	M	35	St_MARTIN	2016-10-14	uv	168	yes	heavy	NA	NA	NA	NA	NA	NA	NA	NA	NA	NA	NA	NA	NA	no	NA	NA	NA
TM-L185	12	F	28	SIAT	2016-12-06	v6	15	no	light	3	2017-03-31	2017-05-03	0	neg	2017-05-19	NA	NA	NA	2017-06-14	2017-07-11	0	neg	yes	NA	NA	NA
TM-L188	9	F	28	SIAT	2016-12-06	v6	2	no	light	3	2017-03-31	2017-05-03	0	neg	2017-05-19	NA	NA	NA	2017-06-14	2017-07-12	0	neg	yes	2018-02-20	positive_p6	31
TM-L189	23	F	56	SIAT	2017-01-17	v6	2	no	light	NA	2017-05-23	NA	NA	NA	NA	NA	NA	NA	NA	NA	NA	NA	no	NA	NA	NA
TM-L190	7	M	24	St_MARTIN	2016-12-06	v6	36	no	light	2.5	2017-04-20	2017-05-18	0	neg	2017-05-18	NA	NA	NA	2017-06-29	NA	0	neg	yes	2018-02-07	positive_p6	3
TM-L191	9	M	28	St_MARTIN	2016-08-09	uv	96	yes	heavy	2	2016-09-13	NA	0	neg	2016-10-24	NA	NA	NA	NA	NA	0	neg	yes	2018-02-06	negative_p6	NA
TM-L193	12	M	37	SIAT	2016-12-06	v6	27	no	light	4	2017-04-06	2017-05-09	0	neg	2017-05-19	NA	NA	NA	2017-06-15	2017-07-12	0	neg	yes	NA	NA	NA
TM-L194	19	F	57	SIAT	2016-08-09	uv	387	yes	heavy	4	2016-09-13	NA	NA	NA	2016-10-24	NA	NA	NA	2016-11-21	NA	NA	NA	no	NA	NA	NA
TM-L195	13	M	37	St_MARTIN	2017-01-26	uv	3	yes	heavy	3.5	2017-04-03	2017-05-18	0	neg	2017-05-18	NA	NA	NA	2017-06-15	NA	0	neg	yes	NA	NA	NA
TM-L196	6	F	17	SIAT	2016-09-09	uv	218	yes	heavy	1.5	2016-09-20	NA	NA	NA	2016-10-24	NA	NA	NA	2016-11-25	2016-12-06	0	neg	yes	NA	NA	NA
TM-L198	13	F	33	SIAT	2016-12-13	v6	33	no	light	3.5	2017-04-24	NA	NA	NA	2017-05-19	NA	NA	NA	2017-06-15	2017-07-11	0	neg	yes	2018-03-15	negative_p6	NA
TM-L200	10	M	30	St_MARTIN	2017-01-27	v6	3	no	light	3.25	2017-03-30	NA	NA	NA	2017-04-30	NA	NA	NA	2017-05-30	NA	NA	NA	no	2018-01-23	negative_p6	NA
TM-L204	14	M	70	PK29	2017-03-09	uv	3	yes	heavy	6.5	2017-05-09	NA	NA	NA	2017-06-12	NA	NA	NA	2017-07-12	NA	NA	NA	no	2018-09-27	negative_p6	NA
TM-L211	9	F	22	St_MARTIN	2017-09-20	v6	2	no	light	2.25	2017-11-09	2017-12-07	2	pos	2017-12-13	NA	NA	NA	2018-01-15	NA	NA	NA	yes	2018-09-25	negative_p6	NA
TM-L226	11	F	33	SIAT	2017-09-04	v6	500	no	heavy	2.5	2017-11-10	2017-12-07	0	neg	2017-12-13	NA	NA	NA	2018-01-13	NA	0	neg	yes	2018-11-07	negative_p6	NA
TM-L227	11	M	34	PK28	2017-09-21	v6	6	no	light	3.5	2017-12-12	2018-01-09	0	neg	2018-01-12	NA	NA	NA	2018-02-13	NA	0	neg	yes	NA	NA	NA
TM-L232	16	F	46	PK33	2018-10-05	p6	1	no	light	4	2018-10-25	2018-12-03	0	neg	2018-12-11	NA	NA	NA	2019-01-15	NA	NA	neg	yes	2018-10-05	positive_p6	1
TM-L238	7	M	24	PK15	2018-10-10	p6	4	no	light	2.5	2018-10-22	2018-11-20	0	neg	2018-11-26	NA	NA	NA	2019-01-04	NA	NA	neg	yes	2018-10-10	positive_p6	4
TM-L239	12	M	33	PK22	2017-09-21	v6	8	no	light	3.5	2017-11-09	2017-12-07	0	neg	2017-12-12	NA	NA	NA	2018-01-13	NA	0	neg	yes	NA	NA	NA
TM-L243	12	F	50	PK10	2017-10-06	v6	12	no	light	5	2017-11-13	2017-12-06	0	neg	2017-12-14	NA	NA	NA	2018-01-15	NA	0	neg	yes	NA	NA	NA
TM-L245	7	F	30	PK21	2018-10-03	p6	3	no	light	3	2018-10-22	2018-11-19	0	neg	2018-11-26	NA	NA	NA	2018-12-26	NA	NA	neg	yes	2018-10-03	positive_p6	3
TM-L246	9	F	25	PK21	2017-04-21	uv	500	yes	heavy	2.5	2017-04-21	NA	0	neg	2017-05-22	NA	NA	NA	2017-06-22	NA	NA	neg	yes	2018-10-05	negative_p6	NA
TM-L250	6	F	25	PK12	2018-01-21	p6	2	no	light	2.5	2018-12-27	NA	NA	NA	NA	NA	NA	NA	NA	NA	NA	NA	no	NA	NA	NA
TM-L251	11	F	39	SIAT	2017-10-10	v6	15	no	light	4	2017-11-20	2017-12-08	0	neg	2017-12-24	2018-01-10	0	neg	2018-01-24	NA	0	neg	yes	2018-11-07	positive_p6	275
TM-L252	9	F	26	SIAT	2017-03-16	uv	500	yes	heavy	2.5	2017-04-24	NA	NA	NA	2017-05-24	NA	NA	NA	2017-06-26	NA	NA	NA	no	NA	NA	NA
TM-L253	7	F	24	SIAT	2017-07-24	v6	1	no	light	2.5	2017-11-21	2017-12-08	0	neg	2017-12-24	NA	NA	NA	2018-01-24	NA	0	neg	yes	NA	NA	NA
TM-L258	14	M	40	SIAT	2017-09-20	v6	66	no	heavy	4	2017-11-10	2017-12-06	0	neg	2017-12-21	NA	NA	NA	2018-01-22	NA	0	neg	yes	2018-12-20	positive_p6	52
TM-L259	13	F	41	PK11	2017-10-04	v6	10	no	light	4.25	2017-11-10	2017-12-08	0	neg	2017-12-19	2018-01-09	NA	NA	2018-01-13	NA	0	neg	yes	2018-11-14	negative_p6	NA
TM-L261	17	M	55	PK18	2017-08-11	v6	8	no	light	NA	NA	NA	NA	NA	NA	NA	NA	NA	NA	NA	NA	NA	no	NA	NA	NA
TM-L269	7	M	22	PK15	2017-09-20	v6	14	no	light	2.25	2017-11-10	2017-12-07	1	pos	2017-12-19	NA	NA	NA	2018-01-13	NA	NA	NA	yes	2018-09-27	negative_p6	NA
TM-L272	12	F	35	SIAT	2017-11-09	v6	1	no	light	3.5	2017-12-08	NA	NA	NA	2018-01-08	NA	NA	NA	2018-02-08	NA	NA	NA	no	NA	NA	NA
TM-L280	21	M	62	BINDO	2017-11-16	v6	75	no	heavy	5	2017-12-13	NA	NA	NA	2018-01-29	NA	NA	NA	NA	NA	NA	NA	no	NA	NA	NA
TM-L308	12	F	43	BINDO	2017-11-23	v6	37	no	light	4.25	2017-12-13	NA	NA	NA	2018-01-17	NA	NA	NA	2018-05-29	2018-06-28	0	neg	yes	NA	NA	NA
TM-L314	19	F	49	BINDO	2018-11-22	p6	1	no	light	5	2018-11-29	2018-12-29	0	neg	2019-01-16	NA	NA	NA	2019-02-15	NA	NA	neg	yes	2018-11-22	positive_p6	3
TM-L327	16	M	52	BINDO	2017-12-07	v6	25	no	light	5	2018-01-04	NA	NA	NA	NA	NA	NA	NA	NA	NA	NA	NA	no	NA	NA	NA
TM-L328	8	F	19	BINDO	2018-01-08	v6	476	no	heavy	1.5	2017-12-13	NA	NA	NA	2018-01-13	NA	NA	NA	2018-02-15	NA	NA	NA	no	2018-10-23	negative_p6	NA
TM-L334	20	F	62	BINDO	2018-01-25	v6	130	no	heavy	5.5	2018-04-10	NA	NA	NA	2018-05-29	2018-06-29	0	neg	2018-06-29	NA	0	neg	yes	2018-11-30	negative_p6	NA
TM-L335	10	F	33	BINDO	2017-12-18	v6	344	no	heavy	3	2018-02-15	NA	NA	NA	2018-03-23	NA	NA	NA	2018-05-29	2018-06-14	38	pos	yes	NA	NA	NA

## Sheet: Table S4
Additional file 1: Table S4. Database used for the survival analysis
ID	age	sex	location	date_event	first_event_occured_at	eggs_count	MacroHaematuria	infection_intensity	event_code	t	treatment1_date	Control1_date	Control1_eggs_count	status_control1	treatment3_date	Control3_date	Control3_eggs_count	status_control3
TM-L007	6	F	pk	2018-02-08	p6	2	no	light	1	1	2018-04-03	2018-05-14	0	neg	NA	NA	0	neg
TM-L015	9	M	pk	2017-02-16	v6	33	no	light	1	1	2017-04-20	2017-05-28	0	neg	2017-06-14	2017-06-30	0	neg
TM-L016	6	M	pk	2016-11-22	v6	5	no	light	1	1	2017-04-13	2017-06-28	0	neg	2017-06-14	2017-06-30	0	neg
TM-L017	10	F	pk	2016-11-18	v6	7	no	light	1	1	2017-04-03	2017-05-05	0	neg	2017-06-14	2017-06-29	0	neg
TM-L018	10	F	pk	2018-02-08	p6	2	no	light	1	1	2018-04-03	2018-05-14	0	neg	NA	NA	0	neg
TM-L022	12	M	pk	2016-11-18	v6	4	no	light	NA	NA	2017-04-18	NA	NA	NA	2017-06-29	NA	0	neg
TM-L025	11	M	pk	2017-02-20	v6	15	no	light	1	3	2017-04-03	2017-05-05	2	pos	2017-06-14	2017-07-11	0	neg
TM-L027	12	F	pk	2016-12-27	v6	27	no	light	1	3	2017-04-03	2017-05-09	3	pos	2017-06-14	2017-07-11	0	neg
TM-L032	10	M	pk	2016-11-18	v6	61	no	heavy	0	3	2017-03-31	2017-05-09	3	pos	2017-06-14	2017-07-12	4	pos
TM-L039	10	M	pk	2016-11-16	v6	6	no	light	1	1	2017-04-04	2017-05-04	0	neg	2017-06-15	NA	0	neg
TM-L054	10	F	pk	2016-11-25	v6	71	no	heavy	1	1	2017-03-31	2017-05-05	0	neg	2017-06-14	NA	0	neg
TM-L061	11	M	pk	2018-02-13	p6	3	no	light	1	1	2018-08-28	2018-07-23	0	neg	NA	NA	0	neg
TM-L063	11	F	pk	2016-09-27	uv	19	yes	heavy	NA	NA	2016-10-03	NA	NA	NA	2016-12-05	2016-12-13	0	neg
TM-L064	6	F	pk	2016-11-18	v6	3	no	light	1	1	2017-03-30	2017-05-04	0	neg	2017-06-14	2017-06-28	0	neg
TM-L065	16	M	pk	2018-01-30	p6	5	no	light	1	1	2018-04-03	2018-05-14	0	neg	NA	NA	0	neg
TM-L066	10	M	pk	2018-02-20	p6	10	no	light	1	1	2018-04-03	2018-05-14	0	neg	NA	NA	0	neg
TM-L067	15	M	pk	2016-12-16	v6	1	no	light	1	1	2017-04-03	2017-05-05	0	neg	2017-06-19	2017-07-25	0	neg
TM-L071	10	F	pk	2016-08-12	uv	33	yes	heavy	1	1	2016-08-23	NA	0	neg	2016-10-24	2016-11-16	0	neg
TM-L073	19	F	pk	2017-03-28	v6	300	no	heavy	NA	NA	2017-04-20	NA	NA	NA	2017-06-27	2017-07-11	0	neg
TM-L074	10	M	pk	2016-11-18	v6	60	no	heavy	1	1	2017-04-03	2017-05-05	0	neg	2017-06-14	2017-07-12	0	neg
TM-L078	8	F	pk	2018-02-07	p6	7	no	light	1	1	2018-04-11	2018-05-15	0	neg	NA	NA	0	neg
TM-L079	14	F	pk	2016-11-30	v6	2	no	light	1	1	2017-03-30	2017-05-03	0	neg	2017-06-15	NA	0	neg
TM-L082	9	M	pk	2016-08-04	uv	10	yes	heavy	1	3	2016-08-04	2016-08-26	1	pos	2016-10-05	2016-11-17	0	neg
TM-L083	14	F	pk	2016-11-17	v6	2	no	light	1	1	2017-03-30	2017-05-03	0	neg	2017-06-15	NA	0	neg
TM-L085	14	M	pk	2016-11-16	v6	500	no	heavy	0	3	2017-03-30	2017-05-03	210	pos	NA	2017-06-28	95	pos
TM-L089	11	M	pk	2016-05-23	uv	108	yes	heavy	NA	NA	2016-05-26	NA	NA	NA	2016-08-14	2016-08-19	0	neg
TM-L090	10	F	pk	2017-02-01	v6	18	no	light	1	1	2017-04-04	2017-05-05	0	neg	2017-06-15	NA	0	neg
TM-L091	8	F	pk	2016-11-17	v6	20	no	light	1	1	2017-03-30	2017-05-03	0	neg	2017-06-15	NA	0	neg
TM-L093	13	M	pk	2016-05-24	uv	20	yes	heavy	0	3	2016-05-26	NA	NA	NA	2016-08-14	2016-08-19	1	pos
TM-L094	14	M	pk	2016-12-13	v6	8	no	light	1	1	2017-04-03	2017-05-09	0	neg	2017-06-15	NA	0	neg
TM-L095	8	M	pk	2016-12-09	v6	5	no	light	1	1	2017-03-30	2017-05-03	0	neg	2017-06-14	2017-06-28	0	neg
TM-L096	10	M	pk	2016-11-18	v6	49	no	light	1	1	2017-03-30	2017-05-03	0	neg	2017-06-14	2017-06-28	0	neg
TM-L100	6	F	pk	2016-08-25	uv	500	yes	heavy	0	3	2016-09-09	NA	NA	NA	NA	2016-11-17	3	pos
TM-L102	12	F	pk	2016-11-18	v6	11	no	light	1	1	2017-04-03	2017-05-09	0	neg	2017-06-15	2017-06-28	0	neg
TM-L103	9	F	pk	2016-12-09	v6	9	no	light	1	1	2017-04-18	2017-05-09	0	neg	2017-06-27	2017-07-25	0	neg
TM-L130	14	M	pk	2017-03-01	v6	14	no	light	1	1	2017-04-04	2017-05-05	0	neg	2017-06-15	NA	0	neg
TM-L134	9	M	pk	2016-12-26	v6	182	no	heavy	1	1	2017-04-03	2017-05-05	0	neg	2017-06-19	2017-07-11	0	neg
TM-L136	16	M	pk	2016-08-05	uv	13	yes	heavy	0	3	2016-08-23	NA	NA	NA	NA	2016-11-22	232	pos
TM-L137	10	M	pk	2016-08-23	uv	500	yes	heavy	0	3	2016-09-13	NA	NA	NA	NA	2017-12-26	28	pos
TM-L138	13	M	pk	2017-02-10	v6	46	no	light	0	3	2017-03-31	2017-05-09	2	pos	2017-06-15	2017-07-11	2	pos
TM-L142	7	M	pk	2016-11-16	v6	213	no	heavy	0	3	2017-04-03	2017-05-05	4	pos	2017-06-14	2017-06-29	4	pos
TM-L145	18	M	pk	2016-11-22	v6	4	no	light	1	1	2017-03-31	2017-05-03	0	neg	2017-06-14	2017-06-30	0	neg
TM-L146	13	F	pk	2016-11-25	v6	318	no	heavy	1	3	2017-03-30	2017-05-08	2	pos	2017-06-14	2017-06-28	0	neg
TM-L147	15	M	pk	2016-06-29	uv	500	yes	heavy	1	3	2016-06-29	NA	1	pos	2016-08-29	2016-12-28	0	neg
TM-L148	8	F	pk	2016-08-11	uv	500	yes	heavy	NA	NA	2016-08-26	NA	NA	NA	2016-10-25	2016-11-22	0	neg
TM-L149	15	M	pk	2016-08-11	uv	265	yes	heavy	NA	NA	2016-08-23	NA	NA	NA	2016-10-26	NA	0	neg
TM-L151	19	F	pk	2016-07-01	uv	29	yes	heavy	NA	NA	2016-07-01	NA	NA	NA	2016-09-29	NA	0	neg
TM-L152	19	F	pk	2016-11-23	v6	101	no	heavy	1	1	2017-04-24	2017-05-09	0	neg	2017-06-15	2017-06-30	0	neg
TM-L153	10	M	pk	2016-07-07	uv	26	yes	heavy	0	1	2016-07-29	2016-08-30	14	pos	2016-09-27	NA	NA	NA
TM-L156	12	M	pk	2016-11-23	v6	26	no	light	1	1	2017-04-06	2017-05-09	0	neg	2017-06-27	NA	0	neg
TM-L157	9	M	pk	2016-12-28	v6	11	no	light	0	1	2017-03-31	2017-05-18	47	pos	2017-06-18	NA	NA	NA
TM-L158	15	F	pk	2016-11-22	v6	8	no	light	1	1	2017-03-31	2017-05-09	0	neg	2017-06-27	2017-07-13	0	neg
TM-L164	13	M	pk	2016-11-22	v6	59	no	heavy	0	3	2017-03-31	2017-05-09	6	pos	2017-06-14	2017-06-28	1	pos
TM-L166	18	M	pk	2016-09-08	uv	37	yes	heavy	NA	NA	2016-09-20	NA	NA	NA	2016-11-21	NA	0	neg
TM-L170	8	F	pk	2016-10-11	uv	500	yes	heavy	NA	NA	2016-09-02	NA	NA	NA	2016-11-03	2016-11-16	0	neg
TM-L171	15	M	pk	2016-11-22	v6	288	no	heavy	1	3	2017-03-31	2017-05-09	12	pos	2017-06-14	2017-07-11	0	neg
TM-L174	14	F	pk	2016-08-30	uv	211	yes	heavy	1	1	2016-09-13	2016-10-14	0	neg	2016-11-14	NA	0	neg
TM-L175	13	M	pk	2016-12-22	v6	52	no	heavy	1	1	2017-04-03	2017-05-09	0	neg	2017-06-19	NA	0	neg
TM-L179	12	M	pk	2018-02-21	p6	3	no	light	1	1	2018-04-03	2018-05-14	0	neg	NA	NA	0	neg
TM-L183	10	F	pk	2016-09-27	uv	80	yes	heavy	NA	NA	2016-03-04	NA	NA	NA	2016-05-04	2016-12-11	0	neg
TM-L185	12	F	pk	2016-12-06	v6	15	no	light	1	1	2017-03-31	2017-05-03	0	neg	2017-06-14	2017-07-11	0	neg
TM-L188	9	F	pk	2016-12-06	v6	2	no	light	1	1	2017-03-31	2017-05-03	0	neg	2017-06-14	2017-07-12	0	neg
TM-L190	7	M	pk	2016-12-06	v6	36	no	light	1	1	2017-04-20	2017-05-18	0	neg	2017-06-29	NA	0	neg
TM-L191	9	M	pk	2016-08-09	uv	96	yes	heavy	1	1	2016-09-13	NA	0	neg	NA	NA	0	neg
TM-L193	12	M	pk	2016-12-06	v6	27	no	light	1	1	2017-04-06	2017-05-09	0	neg	2017-06-15	2017-07-12	0	neg
TM-L195	13	M	pk	2017-01-26	uv	3	yes	heavy	1	1	2017-04-03	2017-05-18	0	neg	2017-06-15	NA	0	neg
TM-L196	6	F	pk	2016-09-09	uv	218	yes	heavy	NA	NA	2016-09-20	NA	NA	NA	2016-11-25	2016-12-06	0	neg
TM-L198	13	F	pk	2016-12-13	v6	33	no	light	NA	NA	2017-04-24	NA	NA	NA	2017-06-15	2017-07-11	0	neg
TM-L211	9	F	pk	2017-09-20	v6	2	no	light	0	1	2017-11-09	2017-12-07	2	pos	2018-01-15	NA	NA	NA
TM-L226	11	F	pk	2017-09-20	v6	500	no	heavy	1	1	2017-11-10	2017-12-07	0	neg	2018-01-13	NA	0	neg
TM-L227	11	M	pk	2017-09-21	v6	6	no	light	1	1	2017-12-12	2018-01-09	0	neg	2018-02-13	NA	0	neg
TM-L232	16	F	pk	2018-10-05	p6	1	no	light	1	1	2018-10-25	2018-12-03	0	neg	NA	NA	NA	neg
TM-L238	7	M	pk	2018-10-10	p6	4	no	light	1	1	2018-10-22	2018-11-20	0	neg	NA	NA	NA	neg
TM-L239	12	M	pk	2017-09-21	v6	8	no	light	1	1	2017-11-09	2017-12-07	0	neg	2018-01-13	NA	0	neg
TM-L243	12	F	pk	2017-10-06	v6	12	no	light	1	1	2017-11-13	2017-12-06	0	neg	2018-01-15	NA	0	neg
TM-L245	7	F	pk	2018-10-03	p6	3	no	light	1	1	2018-10-22	2018-11-19	0	neg	NA	NA	NA	neg
TM-L246	9	F	pk	2017-04-21	uv	500	yes	heavy	NA	NA	2017-04-21	NA	NA	NA	2017-06-22	2017-10-25	0	neg
TM-L251	11	F	pk	2017-10-10	v6	15	no	light	1	1	2017-11-20	2017-12-08	0	neg	2018-01-24	NA	0	neg
TM-L253	7	F	pk	2017-07-24	v6	1	no	light	1	1	2017-11-21	2017-12-08	0	neg	2018-01-24	NA	0	neg
TM-L258	14	M	pk	2017-09-20	v6	66	no	heavy	1	1	2017-11-10	2017-12-06	0	neg	2018-01-22	NA	0	neg
TM-L259	13	F	pk	2017-10-04	v6	10	no	light	1	1	2017-11-10	2017-12-08	0	neg	2018-01-13	NA	0	neg
TM-L269	7	M	pk	2017-09-20	v6	14	no	light	0	1	2017-11-10	2017-12-07	1	pos	2018-01-13	NA	NA	NA
TM-L308	12	F	bindo	2017-11-23	v6	37	no	light	NA	NA	NA	NA	NA	NA	2018-05-29	2018-06-28	0	neg
TM-L314	19	F	bindo	2018-11-22	p6	1	no	light	1	1	2018-11-29	2018-12-29	0	neg	NA	NA	NA	neg
TM-L334	20	F	bindo	2018-01-25	v6	130	no	heavy	NA	NA	NA	NA	NA	NA	2018-06-29	NA	0	neg
TM-L335	10	F	bindo	2017-12-18	v6	344	no	heavy	0	3	NA	NA	NA	NA	2018-05-29	2018-06-14	38	pos
